# Supplementary material for: CuSO4–d-glucose, an inexpensive and eco-efficient catalytic system: direct access to diverse quinolines through modified Friedländer approach involving SNAr/reduction/annulation cascade in one pot
Source: Royal Society of Chemistry journal article supplement (doi:10.1039/c4ra14138e), 2014-12-15
Supplement: c4ra14138e1.pdf [file c4ra14138e1.pdf]

## Supporting Information

### **CuSO<sub>4</sub>-D-glucose an inexpensive and eco-efficient catalytic system: direct access to diverse quinolines through modified Friedländer approach involving S<sub>N</sub>Ar/reduction/annulation cascade in one-pot**

Namrata Anand, Tanmoy Chanda, Suvajit Koley, Sushobhan Chowdhury and  
Maya Shankar Singh\*

Department of Chemistry, Faculty of Science, Banaras Hindu University, Varanasi-221005,  
India

| <b>Table of contents</b>                                    | <b>Pages</b> |
|-------------------------------------------------------------|--------------|
| 1. General procedure                                        | 2            |
| 2. Preparation and characterization of compounds 3          | 2-11         |
| 3. References                                               | 12           |
| 4. Copies of <sup>1</sup> H and <sup>13</sup> C NMR spectra | 13-38        |

## Experimental Section

### 1. General Experimental Details

$^1\text{H}$  and  $^{13}\text{C}$  NMR spectra were recorded at 300 and 75 MHz, respectively. Chemical shift ( $\delta$ ) values are given in parts per million (ppm) with reference to tetramethylsilane (TMS) as the internal standard. Coupling constant ( $J$ ) values are given in Hertz (Hz). The IR spectra were recorded on Varian 3100 FT-IR spectrophotometer. Melting points were determined with Buchi B-540 melting point apparatus and are uncorrected. Commercially obtained reagents were used after further purification when needed. All the reactions were monitored by TLC with silica gel coated plates. Column chromatography was carried out whenever needed, using silica gel of 100/200 mesh. Mixture of hexane/ethyl acetate in appropriate proportion (determined by TLC analysis) was used as eluent.

### 2. a. General procedure for the synthesis of compound 3

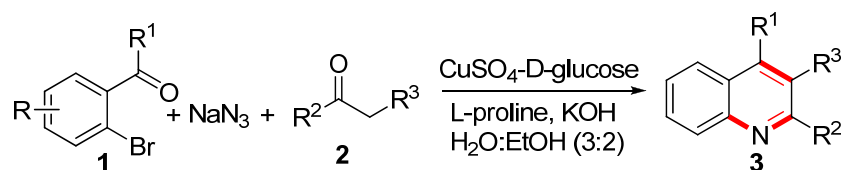

A mixture of 2-bromobenzaldehyde/2-bromoacetophenone **1** (1 mmol), NaN<sub>3</sub> (2 mmol) and cyclic/acyclic ketones **2** (1.1 mmol) in H<sub>2</sub>O + EtOH (3:2, 5 mL) was placed in a 50 mL round bottom flask. To a stirring solution of above mixture added CuSO<sub>4</sub> (0.3 mmol), D-glucose (0.3 mmol), L-proline (0.2 mmol) and KOH (1 mmol). The reaction mixture was allowed to stir at 90 °C for 3-10 h. After completion of reaction (monitored on TLC), solvent was removed under reduced pressure and extracted with ethyl acetate. The combined organic layer was dried over anhydrous sodium sulphate, filtered and the solvent was removed under reduced pressure. The crude residue thus obtained was purified by column chromatography to give the desired quinolines **3**.

## 2. b. Characterization of Compounds 3

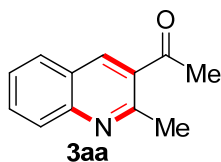

**3-Acetyl-2-methyl quinoline (3aa)**<sup>1</sup>: Pale yellow solid, mp 74-75 °C; IR (KBr)  $\text{cm}^{-1}$ : 3053, 1788, 1624, 1579, 1456, 818  $\text{cm}^{-1}$ ;  $^1\text{H}$  NMR (300 MHz,  $\text{CDCl}_3$ )  $\delta$ : 8.48 (s, 1H, ArH), 8.05 (d,  $J = 8.4$  Hz, 1H, ArH), 7.87-7.76 (m, 2H, ArH), 7.57-7.52 (m, 1H, ArH), 2.91 (s, 3H,  $\text{COCH}_3$ ) 2.72 (s, 3H,  $\text{CH}_3$ );  $^{13}\text{C}$  NMR (75 MHz,  $\text{CDCl}_3$ ):  $\delta$  199.9, 157.5, 138.2, 138.1, 131.6, 131.1, 128.5, 128.2, 126.6, 125.5, 29.2, 25.6.

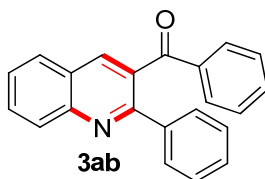

**Phenyl(2-phenylquinolin-3-yl)methanone (3ab)**<sup>2</sup>: Yellow solid, mp 135-137 °C; IR (KBr)  $\text{cm}^{-1}$ : 3163, 2960, 1756, 1684, 1562  $\text{cm}^{-1}$ ;  $^1\text{H}$  NMR (300 MHz,  $\text{CDCl}_3$ )  $\delta$ : 8.23-8.15 (m, 5H, ArH), 8.00 (d,  $J = 6.9$  Hz, 1H, ArH), 7.89-7.81 (m, 2H, ArH), 7.75-7.70 (m, 1H, ArH), 7.55-7.43 (m, 6H, ArH);  $^{13}\text{C}$  NMR (75 MHz,  $\text{CDCl}_3$ )  $\delta$ : 175.7, 157.3, 148.2, 139.6 (2C), 136.7, 132.4, 129.6, 129.2 (2C), 128.8 (3C), 128.6 (3C), 127.4 (2C), 127.1 (2C), 126.2, 118.9.

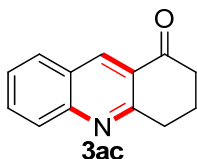

**3,4-Dihydroacridin-1(2H)-one (3ac)**<sup>1</sup>: White solid, mp 103-105 °C; IR (KBr)  $\text{cm}^{-1}$ : 3463, 2926, 1737, 1452, 1230, 835  $\text{cm}^{-1}$ ;  $^1\text{H}$  NMR (300 MHz,  $\text{CDCl}_3$ )  $\delta$ : 8.85 (s, 1H, ArH), 8.06 (d,  $J = 8.4$  Hz, 1H, ArH), 7.94 (d,  $J = 8.1$  Hz, 1H, ArH), 7.83-7.78 (m, 1H, ArH), 7.57 (t,  $J = 7.2$  Hz, 1H, ArH), 3.34 (t,  $J = 6.0$  Hz, 2H,  $\text{CH}_2$ ), 2.82 (t,  $J = 6.0$  Hz, 2H,  $\text{CH}_2$ ), 2.32 (dd,  $J_1 = 6.0$  Hz,  $J_2 = 12.6$  Hz, 2H,  $\text{CH}_2$ );  $^{13}\text{C}$  NMR (75 MHz,  $\text{CDCl}_3$ )  $\delta$ : 197.8, 161.9, 137.1, 132.3, 129.7, 128.4, 126.7, 126.6, 126.2, 39.0, 33.3, 21.7.

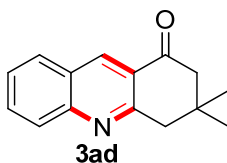

**3,3-Dimethyl-3,4-dihydroacridin-1(2H)-one (3ad)**<sup>1</sup>: White solid, mp 116-118 °C; IR (KBr)  $\text{cm}^{-1}$ : 3062, 1768, 1594, 1488, 1231  $\text{cm}^{-1}$ ;  $^1\text{H}$  NMR (300 MHz,  $\text{CDCl}_3$ )  $\delta$ : 8.82 (s, 1H, ArH), 8.06 (d,  $J = 8.7$  Hz, 1H, ArH), 7.94 (d,  $J = 8.1$  Hz, 1H, ArH), 7.82-7.77 (m, 1H, ArH), 7.57-7.52 (m, 1H, ArH), 3.20 (s, 2H,  $\text{CH}_2$ ), 2.65 (s, 2H,  $\text{CH}_2$ ), 1.15 (s, 6H,  $2 \times \text{CH}_3$ );  $^{13}\text{C}$  NMR (75 MHz,  $\text{CDCl}_3$ )  $\delta$ : 197.9, 160.7, 149.9, 136.4, 132.1, 129.7, 128.5, 126.6 (2C), 125.2, 52.4, 47.1, 32.7, 28.3(2C).

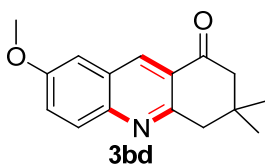

**7-Methoxy-3,3-dimethyl-3,4-dihydroacridin-1(2H)-one (3bd)**<sup>3</sup>: Yellow solid, mp 98-100 °C; IR (KBr)  $\text{cm}^{-1}$ : 3062, 1768, 1594, 1488, 1231  $\text{cm}^{-1}$ ;  $^1\text{H}$  NMR (300 MHz,  $\text{CDCl}_3$ )  $\delta$ : 8.73 (s, 1H, ArH), 7.97 (d,  $J = 9.0$  Hz, 1H, ArH), 7.47-7.43 (m, 1H, ArH), 7.167 (s, 1H, ArH), 3.93 (s, 3H,  $\text{OCH}_3$ ), 3.16 (s, 2H,  $\text{CH}_2$ ), 2.63 (s, 2H,  $\text{CH}_2$ ), 1.14 (s, 6H,  $2 \times \text{CH}_3$ );  $^{13}\text{C}$  NMR (75 MHz,  $\text{CDCl}_3$ )  $\delta$ : 198.1, 158.2, 157.7, 146.1, 135.0, 129.8 (2C), 127.7, 125.3, 106.3, 55.6, 52.4, 46.7, 32.8, 28.3(2C).

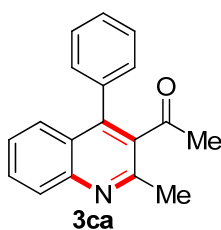

**3-Acetyl-2-methyl-4-phenylquinoline (3ca)**<sup>4</sup>: Yellow solid, mp 112-114 °C; IR (KBr)  $\text{cm}^{-1}$ : 3053, 1788, 1624, 1579, 1456, 818  $\text{cm}^{-1}$ ;  $^1\text{H}$  NMR (300 MHz,  $\text{CDCl}_3$ )  $\delta$ : 8.08 (d,  $J = 8.4$  Hz, 1H, ArH), 7.72-7.67 (m, 1H, ArH), 7.62 (d,  $J = 8.4$  Hz, 1H, ArH), 7.49-7.44 (m, 3H, ArH), 7.42-7.34 (m, 3H, ArH), 2.70 (s, 3H,  $\text{CH}_3$ ), 2.00 (s, 3H,  $\text{CH}_3$ );  $^{13}\text{C}$  NMR (75 MHz,  $\text{CDCl}_3$ )  $\delta$ : 205.5, 153.3, 147.3, 143.7, 135.0, 134.6, 129.9, 129.8 (2C), 128.8, 128.7, 128.5

(2C), 126.3, 126.0, 124.8, 31.8, 23.7.

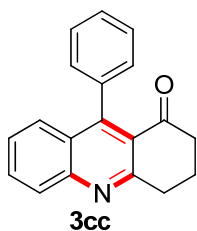

**9-Phenyl-3,4-dihydroacridin-1(2H)-one (3cc)**<sup>4</sup>: Pale yellow solid, mp 153-156 °C; IR (KBr)  $\text{cm}^{-1}$ : 3407, 3048, 2924, 1737, 1498, 1230, 749  $\text{cm}^{-1}$ ;  $^1\text{H}$  NMR (300 MHz,  $\text{CDCl}_3$ )  $\delta$ : 8.08 (d,  $J = 8.4$  Hz, 1H, ArH), 7.78 (m, 1H, ArH), 7.50-7.37 (m, 5H, ArH), 7.19-7.16 (m, 2H, ArH), 3.40 (t,  $J = 6.3$  Hz, 2H,  $\text{CH}_2$ ), 2.72 (t,  $J = 6.3$  Hz, 2H,  $\text{CH}_2$ ), 2.29 (dd,  $J_1 = 6.6$  Hz,  $J_2 = 12.6$  Hz, 2H,  $\text{CH}_2$ );  $^{13}\text{C}$  NMR (75 MHz,  $\text{CDCl}_3$ )  $\delta$ : 197.9, 162.2, 151.4, 148.5, 137.5, 131.7, 128.4 (2C), 128.1, 128.0 (2C), 127.9, 127.5 (2C), 126.4, 123.8, 40.6, 34.5, 21.3.

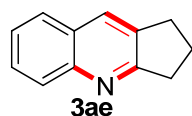

**2,3-Dihydro-1H-cyclopenta[b]quinoline (3ae)**<sup>1</sup>: White solid, mp 55-57 °C; IR (KBr)  $\text{cm}^{-1}$ : 3053, 1646, 1562, 1212  $\text{cm}^{-1}$ ;  $^1\text{H}$  NMR (300 MHz,  $\text{CDCl}_3$ )  $\delta$ : 8.02 (d,  $J = 8.4$  Hz, 1H, ArH), 7.70 (s, 1H, ArH), 7.67-7.64 (m, 1H, ArH), 7.60-7.55 (m, 1H, ArH), 7.43-7.38 (m, 1H, ArH), 3.14 (t,  $J = 7.5$  Hz, 2H,  $\text{CH}_2$ ), 3.02 (t,  $J = 7.2$  Hz, 2H,  $\text{CH}_2$ ), 2.19-2.11 (dd,  $J_1 = 7.5$  Hz,  $J_2 = 15.0$  Hz, 2H,  $\text{CH}_2$ );  $^{13}\text{C}$  NMR (75 MHz,  $\text{CDCl}_3$ )  $\delta$ : 157.6, 147.2, 135.3, 130.0, 128.3, 128.2, 128.0, 127.1, 125.2, 34.3, 30.2, 23.3.

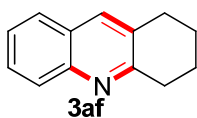

**1,2,3,4-Tetrahydroacridine (3af)**<sup>1,5</sup>: White solid, mp 85-87 °C; IR (KBr)  $\text{cm}^{-1}$ : 3058, 1624, 1557, 1453, 1214  $\text{cm}^{-1}$ ;  $^1\text{H}$  NMR (300 MHz,  $\text{CDCl}_3$ )  $\delta$ : 7.97 (d,  $J = 8.4$  Hz, 1H, ArH), 7.70 (s, 1H, ArH), 7.67-7.64 (m, 1H, ArH), 7.60-7.55 (m, 1H, ArH), 7.42-7.37 (m, 1H, ArH), 3.13 (t,

$J = 6.3$  Hz, 2H, CH<sub>2</sub>), 2.96 (t,  $J = 6.3$  Hz, 2H, CH<sub>2</sub>), 1.99-1.95 (m, 2H, CH<sub>2</sub>), 1.88-1.84 (m, 2H, CH<sub>2</sub>); <sup>13</sup>C NMR (75 MHz, CDCl<sub>3</sub>)  $\delta$ : 159.1, 146.4, 134.8, 130.8, 128.3, 128.1, 127.0, 126.7, 125.3, 33.4, 29.1, 23.1, 22.7.

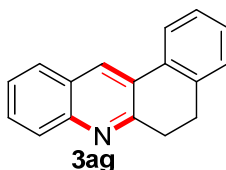

**5,6-Dihydrobenzo[*a*]acridine (3ag)**<sup>6</sup>: Yellow solid, mp 63-65 °C; IR (KBr) cm<sup>-1</sup>: 3417, 2929, 1498, 1278, 1033, 789 cm<sup>-1</sup>; <sup>1</sup>H NMR (300 MHz, CDCl<sub>3</sub>)  $\delta$ : 8.58 (d,  $J = 7.5$  Hz, 1H, ArH), 8.13 (d,  $J = 8.4$  Hz, 1H, ArH), 7.84 (s, 1H, ArH), 7.69-7.59 (m, 2H, ArH), 7.45-7.31 (m, 3H, ArH), 7.24 (d,  $J = 7.2$  Hz, 1H, ArH), 3.08-3.04 (m, 2H, CH<sub>2</sub>), 2.97-2.93 (m, 2H, CH<sub>2</sub>); <sup>13</sup>C NMR (75 MHz, CDCl<sub>3</sub>)  $\delta$ : 153.2, 147.5, 139.3, 134.6, 133.6, 130.4, 129.5, 129.3, 128.5, 127.8, 127.7, 127.2, 126.8, 126.0, 125.9, 28.7, 28.3.

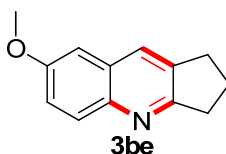

**7-Methoxy-2,3-dihydro-1*H*-cyclopenta[*b*]quinoline (3be)**<sup>7</sup>: White solid, mp 97-99 °C; IR (KBr) cm<sup>-1</sup>: 3407, 3048, 2924, 1595, 1498, 1230, 749 cm<sup>-1</sup>; <sup>1</sup>H NMR (300 MHz, CDCl<sub>3</sub>)  $\delta$ : 7.91 (d,  $J = 9.3$  Hz, 1H, ArH), 7.77 (s, 1H, ArH), 7.28-7.24 (m, 1H, ArH), 7.00 (d,  $J = 2.7$  Hz, 1H, ArH), 3.90 (s, 3H, OCH<sub>3</sub>), 3.24 (t,  $J = 7.5$  Hz, 2H, CH<sub>2</sub>), 3.14-3.02 (m, 4H, 2xCH<sub>2</sub>), 2.23-2.13 (m, 2H, CH<sub>2</sub>); <sup>13</sup>C NMR (75 MHz, CDCl<sub>3</sub>)  $\delta$ : 165.2, 157.0, 143.3, 135.9, 129.7, 129.3, 128.2, 120.4, 105.5, 55.4, 34.2, 30.5, 23.6.

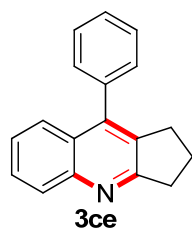

**9-Phenyl-2,3-dihydro-1-cyclopenta[*b*]quinoline (3ce)**<sup>4</sup>: Yellow solid, mp 133-135 °C; IR (KBr)  $\text{cm}^{-1}$ : 3053, 1625, 1586, 1230, 1033, 836  $\text{cm}^{-1}$ ;  $^1\text{H}$  NMR (300 MHz,  $\text{CDCl}_3$ )  $\delta$ : 8.09 (d,  $J = 8.4$  Hz, 1H, ArH), 7.63 (m, 2H, ArH), 7.51-7.45 (m, 3H, ArH), 7.37-7.34 (m, 3H, ArH), 3.24 (t,  $J = 7.5$  Hz, 2H,  $\text{CH}_2$ ), 2.90 (t,  $J = 7.2$  Hz, 2H,  $\text{CH}_2$ ), 2.21-2.11 (m, 2H,  $\text{CH}_2$ );  $^{13}\text{C}$  NMR (75 MHz,  $\text{CDCl}_3$ )  $\delta$ : 167.3, 147.7, 142.8, 136.7, 133.6, 129.2 (2C), 128.6, 128.4, 128.2, 127.9 (2C), 126.2, 125.6, 125.5, 35.1, 30.3, 23.5.

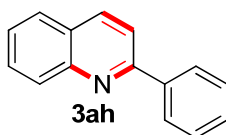

**2-Phenylquinoline (3ah)**<sup>5,6</sup>: White solid, mp 85-87 °C; IR (KBr)  $\text{cm}^{-1}$ : 3056, 1612, 1598, 1557, 1478  $\text{cm}^{-1}$ ;  $^1\text{H}$  NMR (300 MHz,  $\text{CDCl}_3$ )  $\delta$ : 8.21-8.14 (m, 3H, ArH), 7.88-7.80 (m, 2H, ArH), 7.74-7.69 (m, 1H, ArH), 7.55-7.43 (m, 5H, ArH);  $^{13}\text{C}$  NMR (75 MHz,  $\text{CDCl}_3$ )  $\delta$ : 157.3, 148.2, 139.6, 129.6, 129.2 (2C), 128.8 (2C), 127.5 (2C), 127.4, 127.1, 126.2, 118.9.

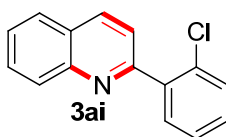

**2-(2-Chlorophenyl)quinoline (3ai)**<sup>8</sup>: White solid, mp 72-75 °C; IR (KBr)  $\text{cm}^{-1}$ : 3063, 1614, 1574, 1512, 1423  $\text{cm}^{-1}$ ;  $^1\text{H}$  NMR (300 MHz,  $\text{CDCl}_3$ )  $\delta$ : 8.20-8.17 (m, 2H, ArH), 8.13-8.08 (m, 2H, ArH), 7.81-7.69 (m, 2H, ArH), 7.54-7.45 (m, 3H, ArH);  $^{13}\text{C}$  NMR (75 MHz,  $\text{CDCl}_3$ )  $\delta$ : 155.9, 148.1, 137.9, 136.9, 135.5, 129.9, 129.8, 128.9 (2C), 128.7 (2C), 127.4, 127.1, 126.4, 118.6.

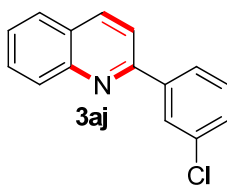

**2-(2-Chlorophenyl)quinoline (3aj)**<sup>9</sup>: White solid, mp 65-67 °C; IR (KBr)  $\text{cm}^{-1}$ : 3025, 2915, 1664, 1574, 1497, 1431, 815  $\text{cm}^{-1}$ ;  $^1\text{H}$  NMR (300 MHz,  $\text{CDCl}_3$ )  $\delta$ : 8.24-8.16 (m, 3H, ArH), 8.03-7.97 (m, 1H, ArH), 7.85-7.71 (m, 3H, ArH), 7.56-7.51 (m, 2H, ArH);  $^{13}\text{C}$  NMR (75 MHz,  $\text{CDCl}_3$ )  $\delta$ : 155.7, 137.0, 134.9, 132.6, 130.8, 130.2, 129.9, 129.7, 129.3, 128.5, 127.7, 127.4, 126.6, 125.6, 118.6.

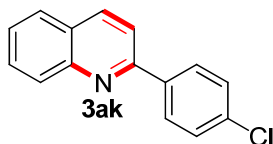

**2-(4-Chlorophenyl)quinoline (3ak)**<sup>8</sup>: White solid, mp 110-113 °C; IR (KBr)  $\text{cm}^{-1}$ : 3065, 1610, 1553, 1525, 1412  $\text{cm}^{-1}$ ;  $^1\text{H}$  NMR (300 MHz,  $\text{CDCl}_3$ )  $\delta$ : 8.20-8.08 (m, 4H, ArH), 7.81-7.69 (m, 3H, ArH), 7.54-7.46 (3H, ArH);  $^{13}\text{C}$  NMR (75 MHz,  $\text{CDCl}_3$ )  $\delta$ : 155.9, 148.1, 138.0, 136.9, 135.5, 129.7, 129.6, 128.9 (2C), 128.7 (2C), 127.4, 127.1, 126.4, 118.4.

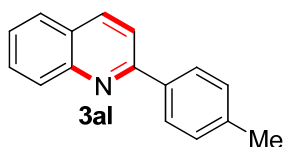

**2-p-Tolylquinoline (3al)**<sup>6</sup>: White solid, mp 80-82 °C; IR (KBr)  $\text{cm}^{-1}$ : 3422, 2915, 1668, 1618, 1596, 1497, 815, 788  $\text{cm}^{-1}$ ;  $^1\text{H}$  NMR (300 MHz,  $\text{CDCl}_3$ )  $\delta$ : 8.15 (d,  $J = 8.4$  Hz, 2H, ArH), 8.06 (d,  $J = 8.1$  Hz, 2H, ArH), 7.83-7.68 (m, 3H, ArH), 7.49-7.47 (m, 1H, ArH), 7.32 (d,  $J = 7.8$  Hz, 2H, ArH), 2.41 (s, 3H,  $\text{CH}_3$ );  $^{13}\text{C}$  NMR (75 MHz,  $\text{CDCl}_3$ )  $\delta$ : 157.2, 148.2, 139.3, 136.8, 136.5, 129.6 (2C), 129.4 (2C), 127.3 (3C), 127.0, 126.0, 118.7, 21.2.



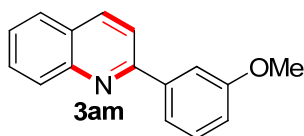

**2-(3-Methoxyphenyl)quinoline (3am)**<sup>9</sup>: Yellow oil, IR (Neat)  $\text{cm}^{-1}$ : 3152, 1604, 1563, 1498  $\text{cm}^{-1}$ ;  $^1\text{H}$  NMR (300 MHz,  $\text{CDCl}_3$ )  $\delta$ : 8.17 (d,  $J = 8.4$  Hz, 1H, ArH), 8.10 (d,  $J = 8.7$  Hz, 1H, ArH), 7.78-7.65 (m, 5H, ArH), 7.47-7.35 (m, 2H, ArH), 6.99 (d,  $J = 8.1$  Hz, 1H, ArH), 3.86 (s, 3H,  $\text{OCH}_3$ );  $^{13}\text{C}$  NMR (75 MHz,  $\text{CDCl}_3$ )  $\delta$ : 160.0, 156.8, 148.0, 140.9, 136.5, 129.6, 129.5, 129.4, 127.3, 127.1, 126.1, 119.8, 118.8, 115.2, 112.6, 55.2.

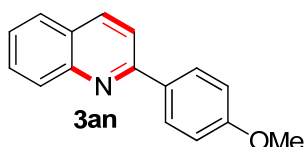

**2-(4-Methoxyphenyl)quinoline (3an)**<sup>6</sup>: White solid, mp 117-120  $^\circ\text{C}$ ; IR (KBr)  $\text{cm}^{-1}$ : 3039, 2921, 2840, 1604, 1499, 1251, 1029, 818  $\text{cm}^{-1}$ ;  $^1\text{H}$  NMR (300 MHz,  $\text{CDCl}_3$ )  $\delta$ : 8.14-8.11 (m, 4H, ArH), 7.80-7.75 (m, 2H, ArH), 7.71-7.65 (m, 1H, ArH), 7.49-7.44 (m, 1H, ArH), 7.03 (d,  $J = 8.7$  Hz, 2H, ArH), 3.85 (s, 3H,  $\text{OCH}_3$ );  $^{13}\text{C}$  NMR (75 MHz,  $\text{CDCl}_3$ )  $\delta$ : 160.7, 156.8, 148.2, 136.5, 132.1, 129.5, 129.4, 128.8, 127.3, 126.8, 125.8, 118.4, 114.1 (2C), 55.3.

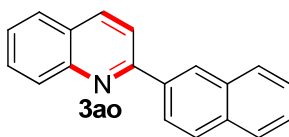

**2-(Naphthalen-2-yl)quinoline (3ao)**<sup>6</sup>: White solid, mp 163-165  $^\circ\text{C}$ ; IR (KBr)  $\text{cm}^{-1}$ : 3058, 1622, 1567  $\text{cm}^{-1}$ ;  $^1\text{H}$  NMR (300 MHz,  $\text{CDCl}_3$ )  $\delta$ : 8.59 (s, 1H, ArH), 8.37 (d,  $J = 8.7$  Hz, 1H, ArH), 8.22 (d,  $J = 8.4$  Hz, 2H, ArH), 8.00-7.96 (m, 3H, ArH), 7.89-7.86 (m, 1H, ArH), 7.82 (d,  $J = 8.1$  Hz, 1H, ArH), 7.75-7.70 (m, 1H, ArH), 7.53-7.49 (m, 2H, ArH);  $^{13}\text{C}$  NMR (75 MHz,  $\text{CDCl}_3$ )  $\delta$ : 157.1, 148.3, 136.7, 133.8, 133.4, 129.6, 128.9, 128.7 (2C), 128.5, 127.6, 127.4, 127.2, 127.1, 126.6, 126.2 (2C), 125.0, 119.0.

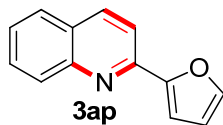

**2-(Furan-2-yl)quinoline (3ap)**<sup>6</sup>: White solid, mp 90-92 °C; IR (KBr)  $\text{cm}^{-1}$ : 3152, 1618, 1523  $\text{cm}^{-1}$ ;  $^1\text{H}$  NMR (300 MHz,  $\text{CDCl}_3$ )  $\delta$ : 8.15-8.12 (m, 2H, ArH), 7.81-7.61 (m, 4H, ArH), 7.47 (t,  $J = 7.5$  Hz, 1H, ArH), 7.22-7.21 (m, 1H, ArH), 6.57 (bs, 1H, ArH);  $^{13}\text{C}$  NMR (75 MHz,  $\text{CDCl}_3$ )  $\delta$ : 153.6, 148.9, 148.0, 144.0, 136.6, 129.8, 129.3, 127.5, 127.1, 126.1, 117.4, 112.1, 110.0.

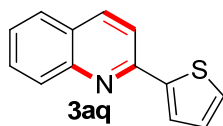

**2-(Thiophen-2-yl)quinoline (3aq)**<sup>6</sup>: White solid, mp 125-128 °C; IR (KBr)  $\text{cm}^{-1}$ : 3101, 3054, 1624, 1578, 1223  $\text{cm}^{-1}$ ;  $^1\text{H}$  NMR (300 MHz,  $\text{CDCl}_3$ )  $\delta$ : 8.11-8.06 (m, 2H, ArH), 7.77-7.65 (m, 4H, ArH), 7.48-7.43 (m, 2H, ArH), 7.15-7.12 (m, 1H, ArH);  $^{13}\text{C}$  NMR (75 MHz,  $\text{CDCl}_3$ )  $\delta$ : 152.2, 148.0, 145.3, 136.5, 129.7, 129.2, 128.5, 128.0, 127.4, 127.1, 126.0, 125.7, 117.5.

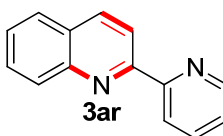

**2-(Pyridin-3-yl)quinoline (3ar)**<sup>10</sup>: White solid, mp 93-95 °C; IR (KBr)  $\text{cm}^{-1}$ : 3059, 2924, 1599, 1095, 787  $\text{cm}^{-1}$ ;  $^1\text{H}$  NMR (300 MHz,  $\text{CDCl}_3$ )  $\delta$ : 8.51 (d,  $J = 7.8$  Hz, 1H, ArH), 8.25 (d,  $J = 8.7$  Hz, 1H, ArH), 8.18 (d,  $J = 8.4$  Hz, 1H, ArH), 7.86-7.71 (m, 4H, ArH), 7.56-7.47 (m, 3H, ArH);  $^{13}\text{C}$  NMR (75 MHz,  $\text{CDCl}_3$ )  $\delta$ : 154.5, 150.0, 148.6, 148.2, 137.0 (2C), 134.8, 129.9, 129.6, 127.4, 127.2, 126.7 (2C), 118.4.

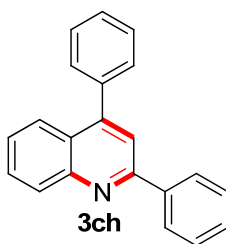

**2,4-Diphenylquinoline (3ch)**<sup>11</sup>: White solid, mp 112-115 °C; IR (KBr)  $\text{cm}^{-1}$ : 3423, 3086, 2955, 1589, 1095, 846  $\text{cm}^{-1}$ ;  $^1\text{H}$  NMR (300 MHz,  $\text{CDCl}_3$ )  $\delta$ : 7.81 (d,  $J = 7.2$  Hz, 4H, ArH), 7.67-7.56 (m, 4H, ArH), 7.51-7.38 (m 5H, ArH), 7.35-7.31 (m, 2H, ArH);  $^{13}\text{C}$  NMR (75 MHz,  $\text{CDCl}_3$ )  $\delta$ : 163.1, 140.5, 137.5, 136.2, 136.0, 133.6, 133.0, 132.3, 131.8, 131.0, 130.0, 129.9, 129.0, 128.8, 128.5, 128.2, 128.1, 127.1, 119.4, 118.5, 118.5.

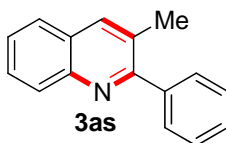

**3-Methyl-2-phenylquinoline (3as)**<sup>5,6</sup>: Yellow oil; IR (Neat)  $\text{cm}^{-1}$ : 3052, 1618, 1553, 1431, 1097, 756  $\text{cm}^{-1}$ ;  $^1\text{H}$  NMR (300 MHz,  $\text{CDCl}_3$ )  $\delta$ : 8.13 (d,  $J = 8.4$  Hz, 1H, ArH), 7.96 (s, 1H, ArH), 7.74 (d,  $J = 8.1$  Hz, 1H, ArH), 7.65-7.56 (m, 3H, ArH), 7.46-7.40 (m, 4H, ArH), 2.43 (s, 3H,  $\text{CH}_3$ );  $^{13}\text{C}$  NMR (75 MHz,  $\text{CDCl}_3$ )  $\delta$ : 160.4, 146.5, 140.8, 136.6, 129.2, 129.0, 128.7 (2C), 128.6, 128.1 (2C), 128.0, 127.5, 126.6, 126.2, 20.5.

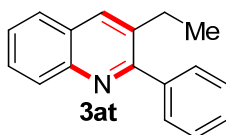

**3-Ethyl-2-phenylquinoline (3at)**<sup>12</sup>: Yellow oil. IR (Neat)  $\text{cm}^{-1}$ : 3048, 2924, 1595, 1432, 749  $\text{cm}^{-1}$ ;  $^1\text{H}$  NMR (300 MHz,  $\text{CDCl}_3$ )  $\delta$ : 8.14 (d,  $J = 8.4$  Hz, 1H, ArH), 8.01 (s, 1H, ArH), 7.79 (d,  $J = 7.8$  Hz, 1H, ArH), 7.66-7.61 (m, 1H, ArH), 7.54-7.52 (m, 2H, ArH), 7.48-7.41 (m, 4H, ArH), 2.81-2.73 (m, 2H,  $\text{CH}_2$ ), 1.19 (t,  $J = 7.8$  Hz, 3H,  $\text{CH}_3$ );  $^{13}\text{C}$  NMR (75 MHz,  $\text{CDCl}_3$ )  $\delta$ : 160.5, 146.2, 140.8, 135.1, 134.8, 129.1, 128.7, 128.6, 128.1, 127.9, 127.6, 126.8, 126.2, 25.9, 14.6.

### 3. References

1. Z.-H. Yu, H. -F. Zheng, W. Yuan, Z.-L. Tang, A.-D. Zhang and D.-Q. Shi, *Tetrahedron*, 2013, **69**, 8137-8141.
2. R.-G. Xing, Y.-N. Li, Q. Liu, Y. -F. Han, X. Wei, J. Li, and B. Zhou, *Synthesis*, 2011, **13**, 2066-2072.
3. C. G. Neochoritis, N. Eleftheriadis, A. Tsiantou, J. S. Stephanatou and C. A. Tsoleridis, *Synlett*, 2013, **24**, 2768-2772.
4. S. Genovese, F. Epifano, M. C. Marcotullio, C. Pelucchini and M. Curini, *Tetrahedron Lett.*, 2011, **52**, 3474-3477.
5. H. V. Mierde, P. V. D. Voort, D. D. Vos and F. Verpoort, *Eur. J. Org. Chem.*, 2008, 1625-1631.
6. C. S. Cho, B. T. Kim, H.-J. Choi, T.-J. Kim and S. C. Shim, *Tetrahedron*, 2003, **59**, 7997-8002.
7. M. Austin, O. J. Egan, R. Tully and A. C. Pratt, *Org. Biomol. Chem.*, 2007, **5**, 3778-3786.
8. Z. Wang, S. Li, B. Yu, H. Wu, Y. Wang and X. Sun, *J. Org. Chem.*, 2012, **77**, 8615-8620.
9. R. Han, S. Chen, S. J. Lee, F. Qi, X. Wu and B. H. Kim, *Heterocycles*, 2006, **68**, 1675-1684.
10. K. Motokura, T. Mizugaki, K. Ebitani, K. Kaneda, *Tetrahedron Lett.*, 2004, **45**, 6029-6032.
11. R. Martínez, D. J. Ramón and M. Yus, *Eur. J. Org. Chem.*, 2007, 1599-1605.
12. A. R. Katritzky and M. Arend, *J. Org. Chem.*, **1998**, *63*, 9989-9991.

# <sup>1</sup>H NMR of 3aa

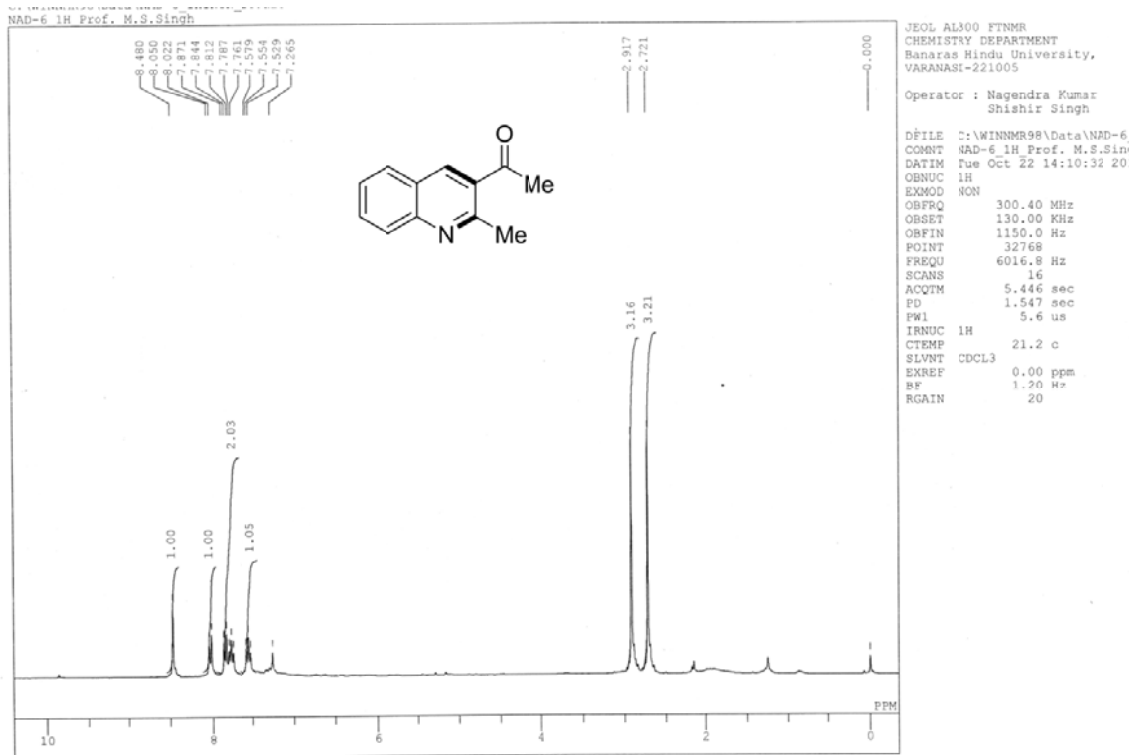

# <sup>13</sup>C NMR of 3aa

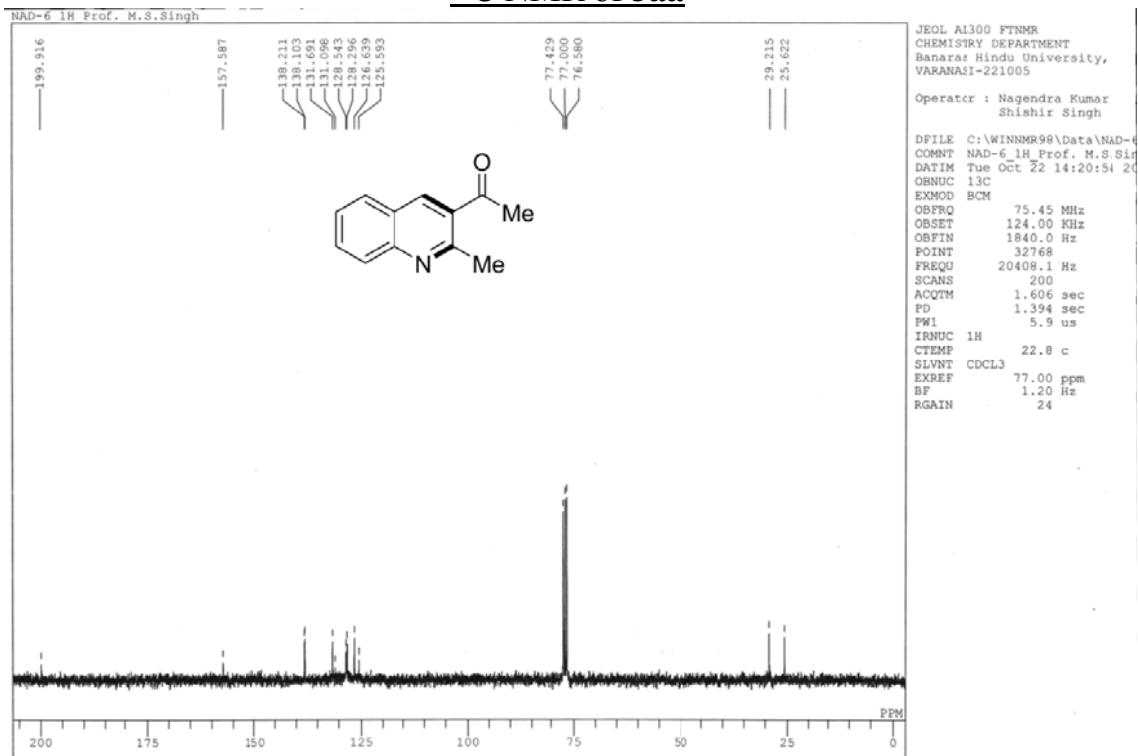

## <sup>1</sup>H NMR of 3ab

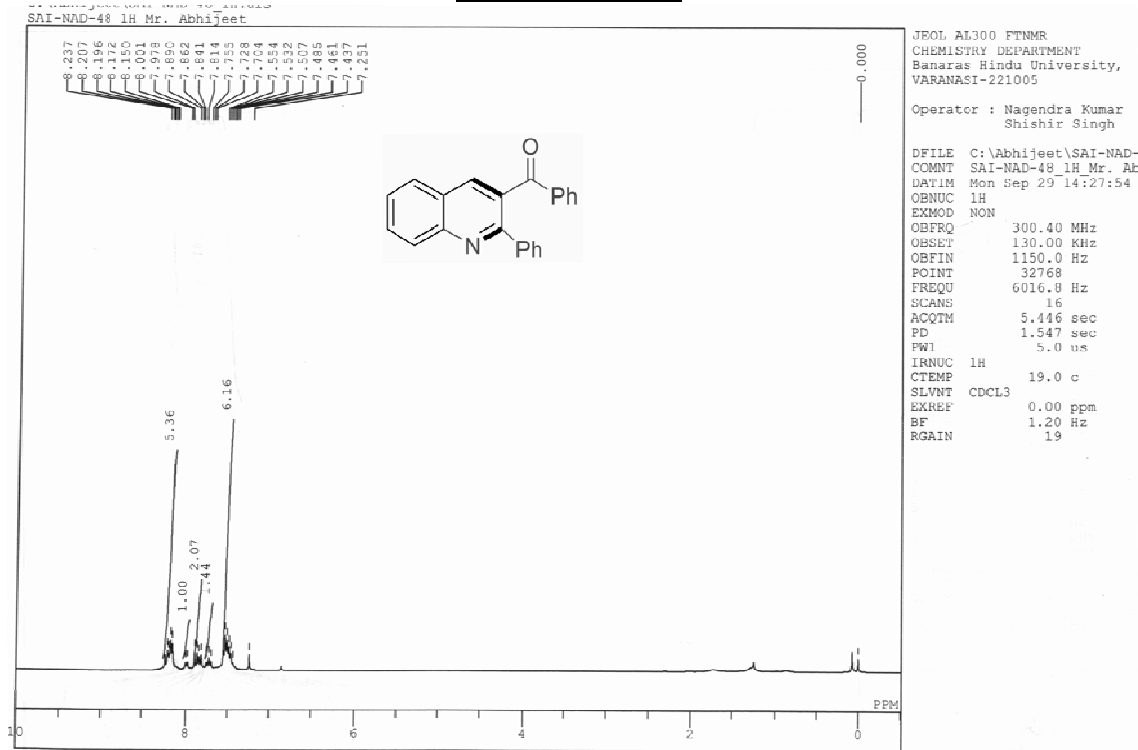

## <sup>13</sup>C NMR of 3ab

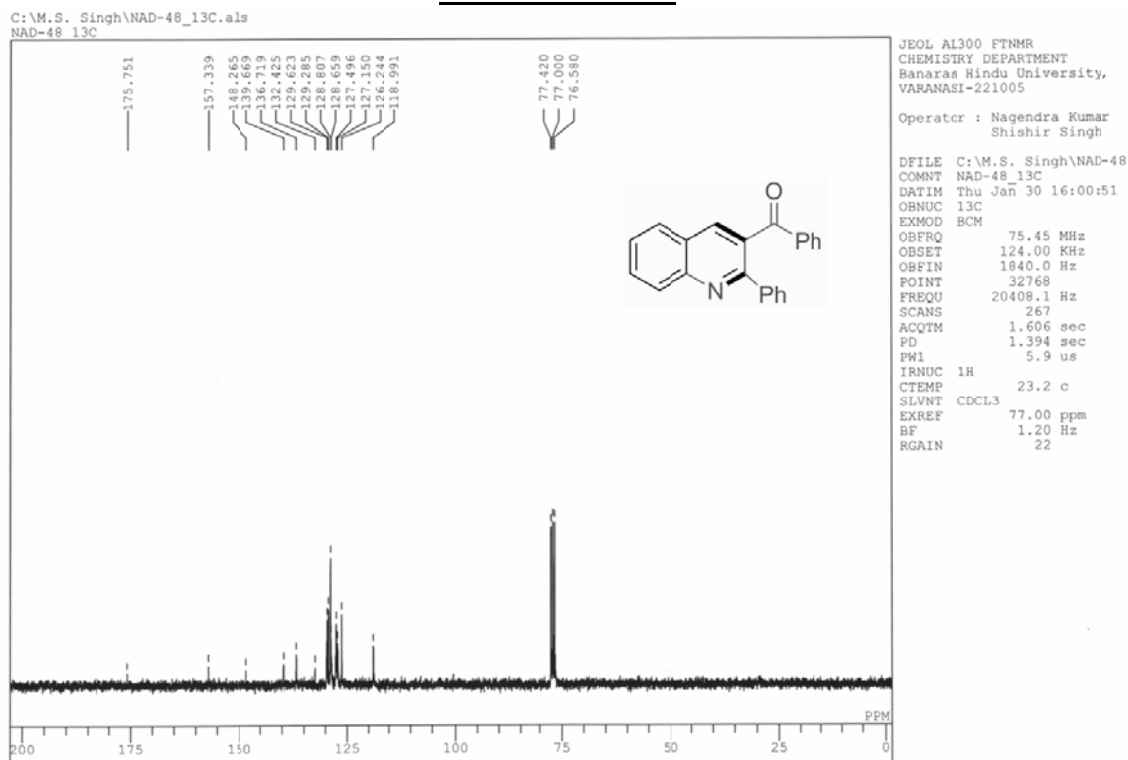

## <sup>1</sup>H NMR of 3ac

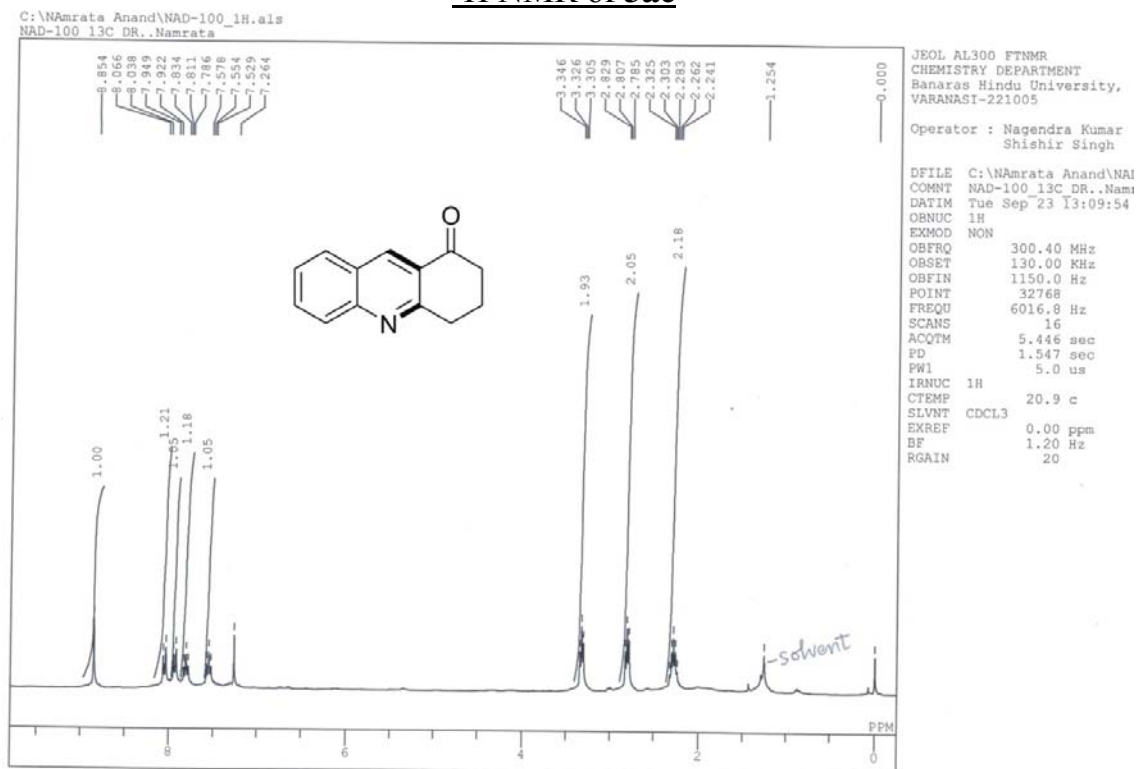

## <sup>13</sup>C NMR of 3ac

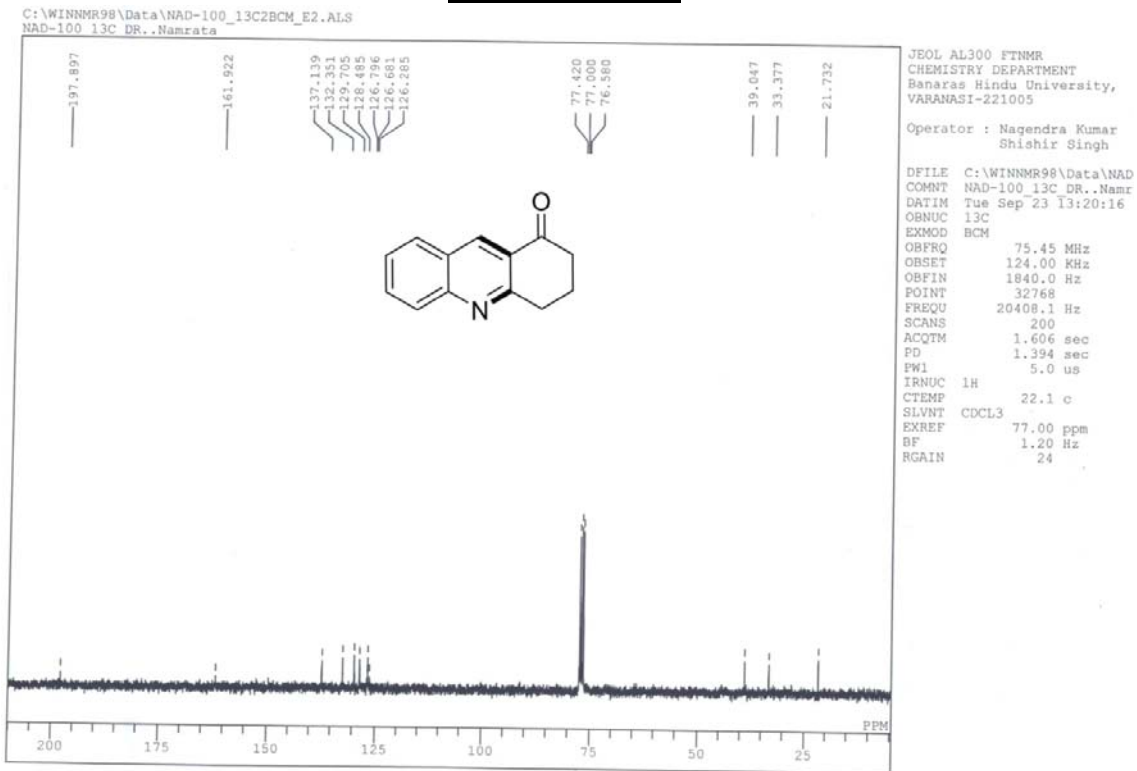

## <sup>1</sup>H NMR of 3ad

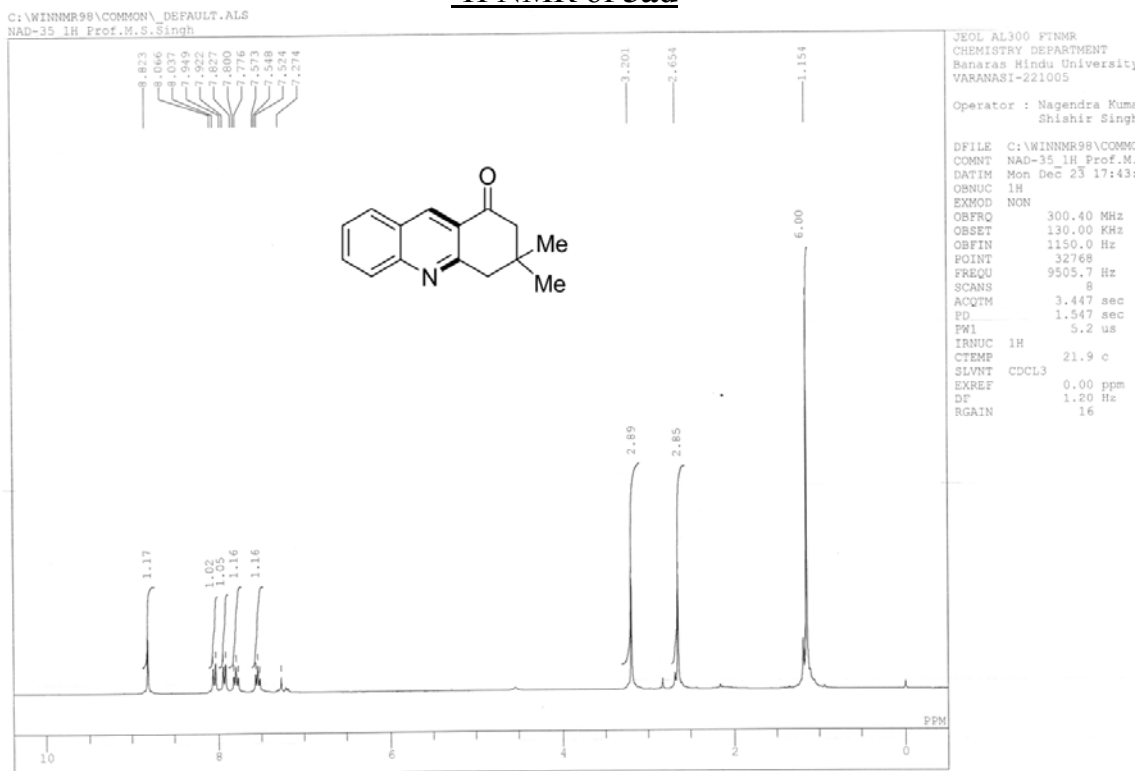

## <sup>13</sup>C NMR of 3ad

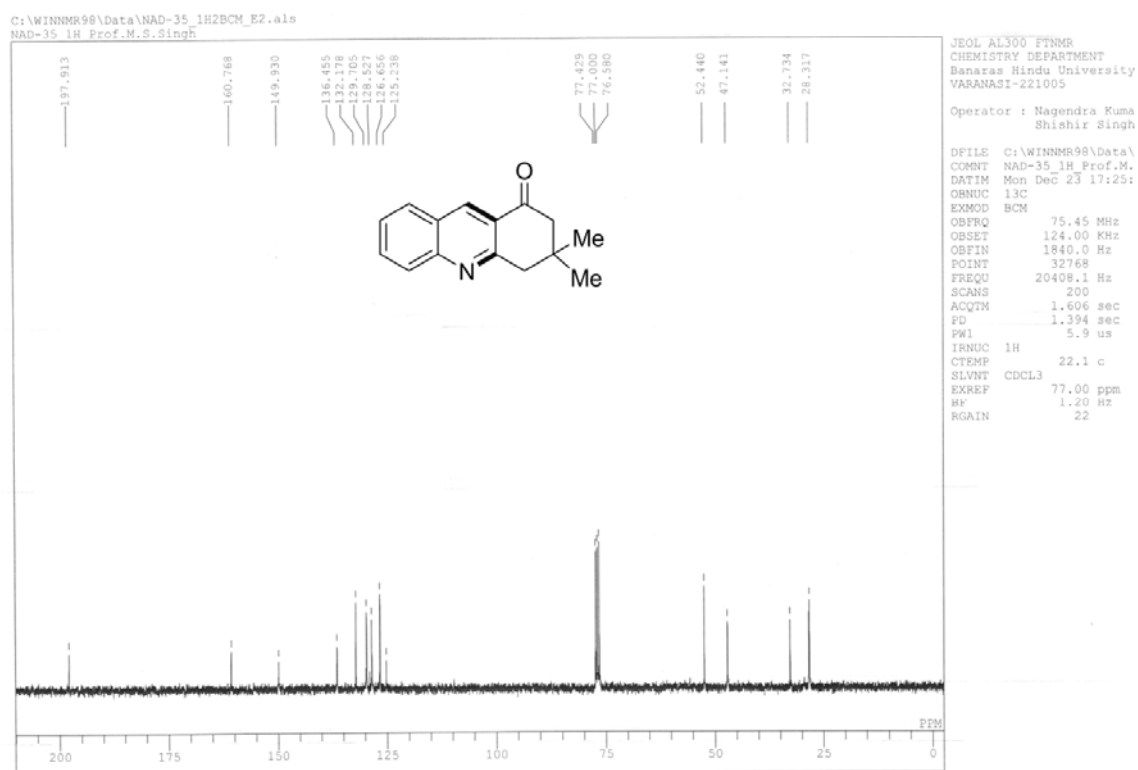



## <sup>1</sup>H NMR of 3bd

C:\NAMrta Anand\NAD-62 1H.als  
NAD-62 1H Prof. M.S. Singh

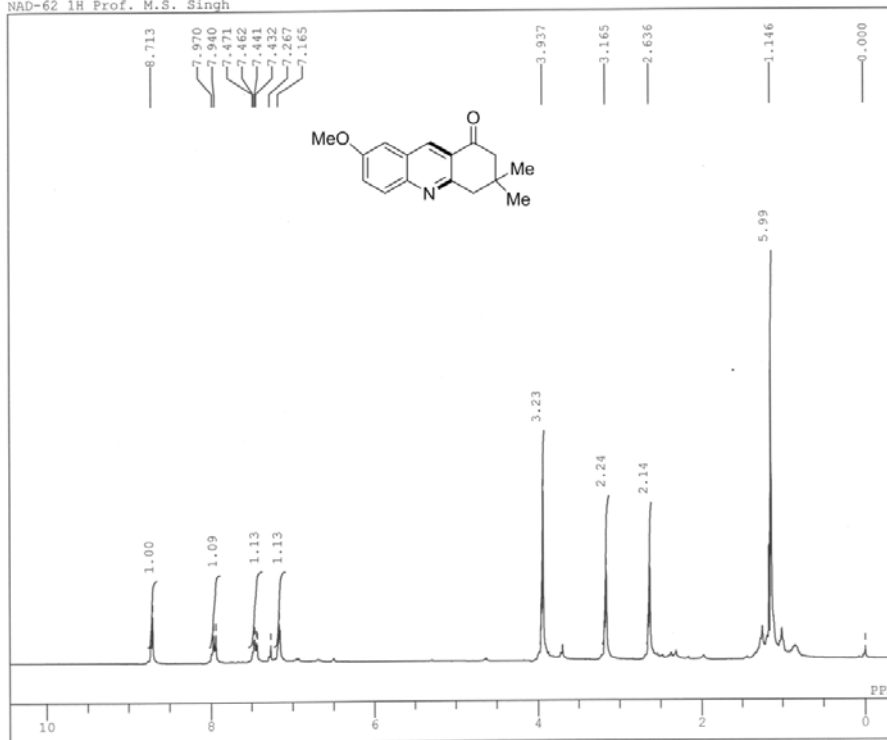

JEOL AL300 FTNMR  
CHEMISTRY DEPARTMENT  
Banaras Hindu University,  
VARANASI-221005

Operator : Nagendra Kumar  
Shishir Singh

DFILE C:\NAMrta Anand\NAD  
COMNT NAD-62\_1H Prof. M.S.  
DATIM Wed Mar 26 15:53:36  
OBNUC 1H  
EXMOD NON  
OBFRQ 300.40 MHz  
OBSET 130.00 KHz  
OBFIN 1150.0 Hz  
POINT 32768  
FREOU 9505.7 Hz  
SCANS 8  
ACQTM 3.447 sec  
PD 1.547 sec  
PW1 5.2 us  
IRNUC 1H  
CTEMP 17.3 c  
SLVNT CDCL3  
EXREF 0.00 ppm  
BF 1.20 Hz  
RGAIN 16

## <sup>13</sup>C NMR of 3bd

C:\WINNMR98\COMMON\DEFAULT.ALS  
NAD-62 13C Prof. M.S. Singh

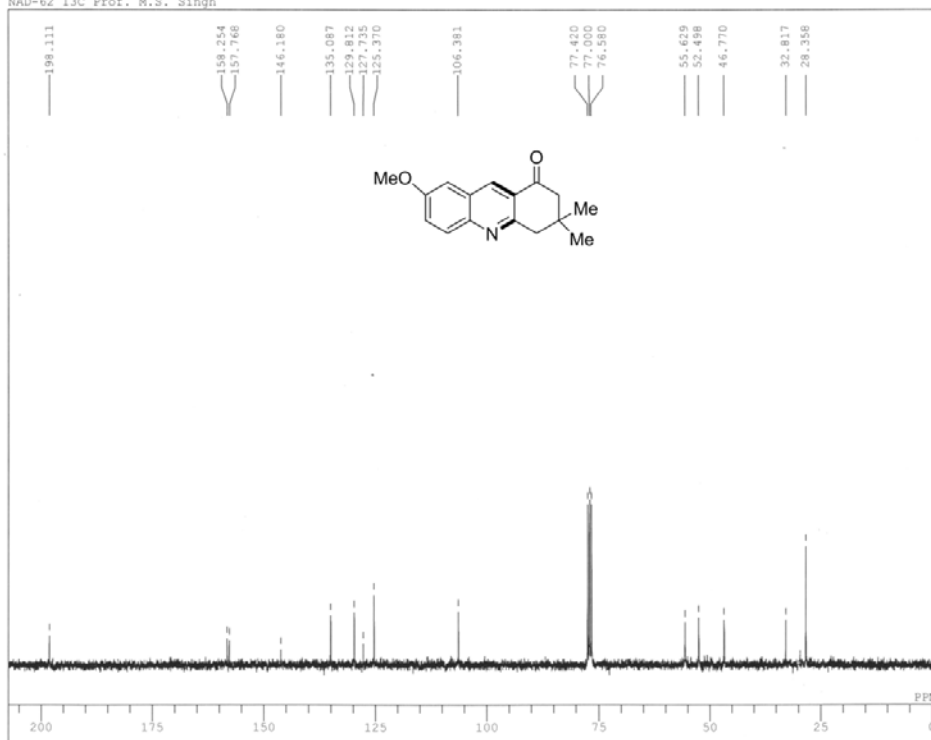

JEOL AL300 FTNMR  
CHEMISTRY DEPARTMENT  
Banaras Hindu University,  
VARANASI-221005

Operator : Nagendra Kuma  
Shishir Singr

DFILE C:\WINNMR98\COMMC  
COMNT NAD-62\_13C Prof.  
DATIM Wed Mar 26 15:45:  
OBNUC 13C  
EXMOD BCM  
OBFRQ 75.45 MHz  
OBSET 124.00 KHz  
OBFIN 1840.0 Hz  
POINT 32768  
FREOU 20408.1 Hz  
SCANS 231  
ACQTM 1.606 sec  
PD 1.394 sec  
PW1 6.0 us  
IRNUC 1H  
CTEMP 17.9 c  
SLVNT CDCL3  
EXREF 77.00 ppm  
BF 1.20 Hz  
RGAIN 23

## <sup>1</sup>H NMR of 3ca

C:\WINNMR98\Data\NAD-95\_1H1NON\_E8.ALS  
NAD-95 1H Mrs. Namrata Anand

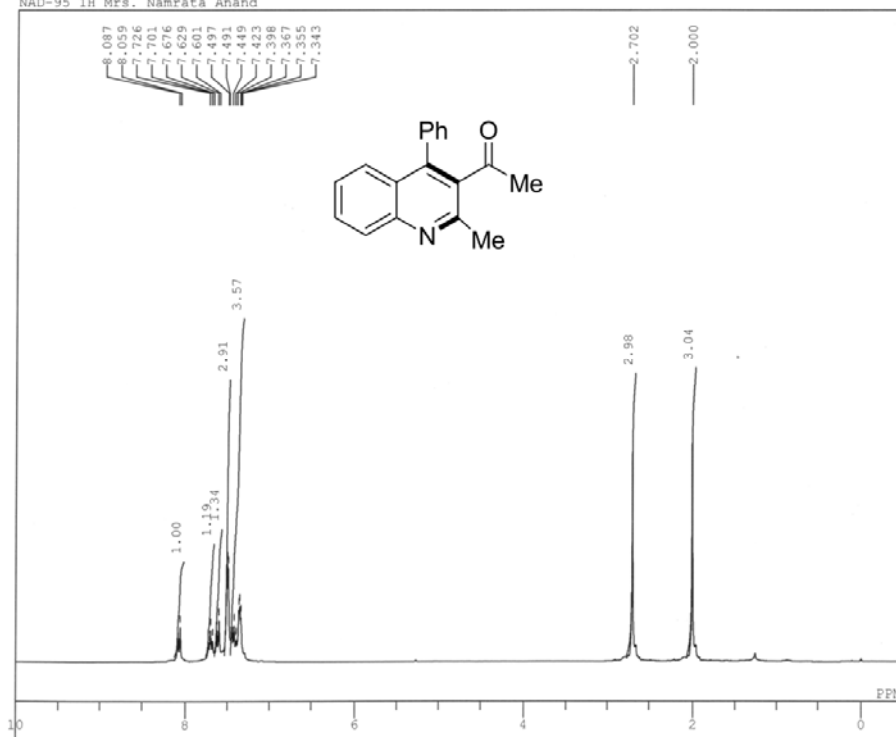

JEOL AL300 FTNMR  
CHEMISTRY DEPARTMENT  
Banaras Hindu University,  
VARANASI-221005

Operator : Nagendra Kumar  
Shishir Singh

DFILE C:\WINNMR98\Data\NAD  
COMNT NAD-95\_1H Mrs. Namra  
DATIM Wed Sep 24 15:35:59  
OBNUC 1H  
EXMOD NON  
OBFREQ 300.40 MHz  
OBSET 130.00 KHz  
OBFIN 1150.0 Hz  
POINT 32768  
FREQU 6016.8 Hz  
SCANS 16  
ACQTM 5.446 sec  
PD 1.547 sec  
FW1 5.0 us  
IRNUC 1H  
CTEMP 22.1 c  
SLVNT CDCL3  
EXREF 0.00 ppm  
BF 1.20 Hz  
RGAIN 13

## <sup>13</sup>C NMR of 3ca

C:\WINNMR98\Data\NAD-95\_1H2BCM\_E8.ALS  
NAD-95 13C Mrs. Namrata Anand

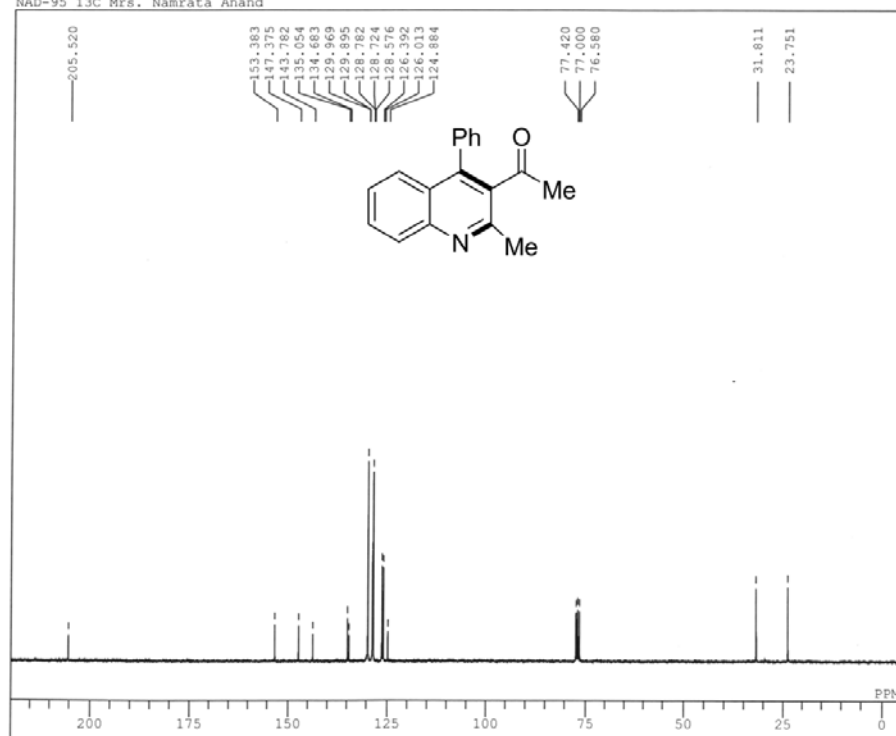

JEOL AL300 FTNMR  
CHEMISTRY DEPARTMENT  
Banaras Hindu University,  
VARANASI-221005

Operator : Nagendra Kumar  
Shishir Singh

DFILE C:\WINNMR98\Data\NAD  
COMNT NAD-95\_13C Mrs. Namr  
DATIM Wed Sep 24 15:48:27  
OBNUC 13C  
EXMOD BCM  
OBFREQ 75.45 MHz  
OBSET 124.00 KHz  
OBFIN 1840.0 Hz  
POINT 32768  
FREQU 20408.1 Hz  
SCANS 243  
ACQTM 1.606 sec  
PD 1.394 sec  
FW1 5.0 us  
IRNUC 1H  
CTEMP 23.3 c  
SLVNT CDCL3  
EXREF 77.00 ppm  
BF 1.20 Hz  
RGAIN 22

## <sup>1</sup>H NMR of 3cc

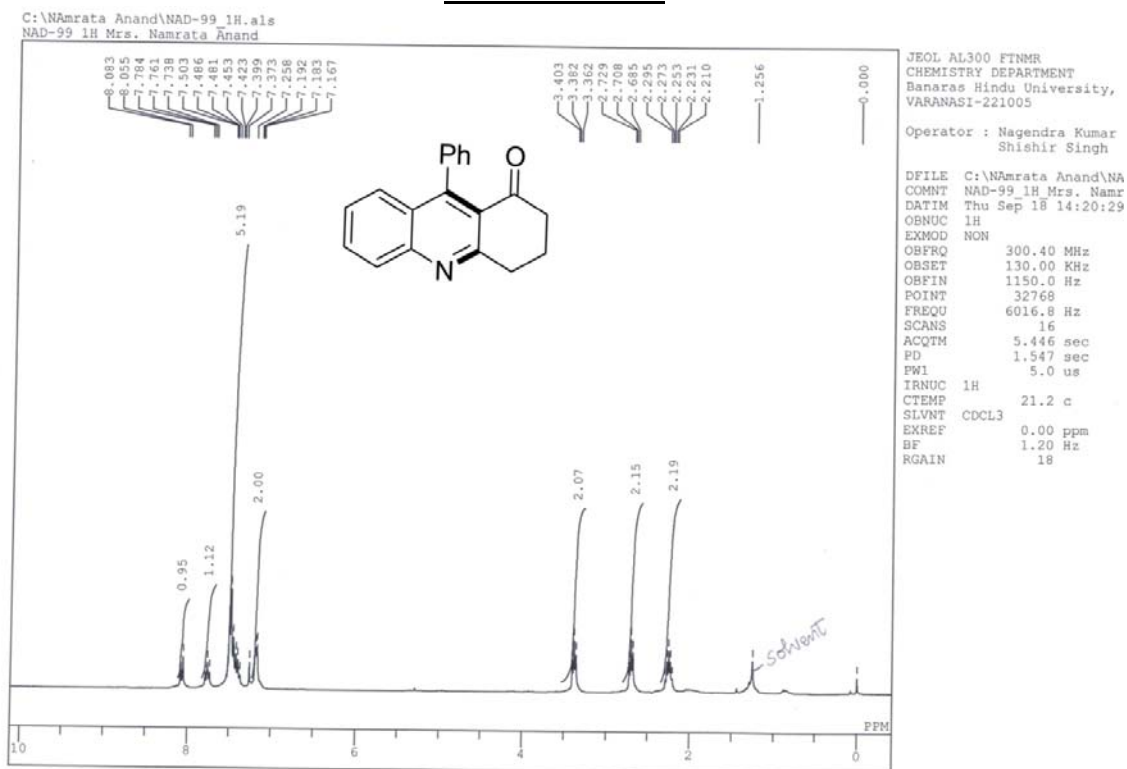

## <sup>13</sup>C NMR of 3cc

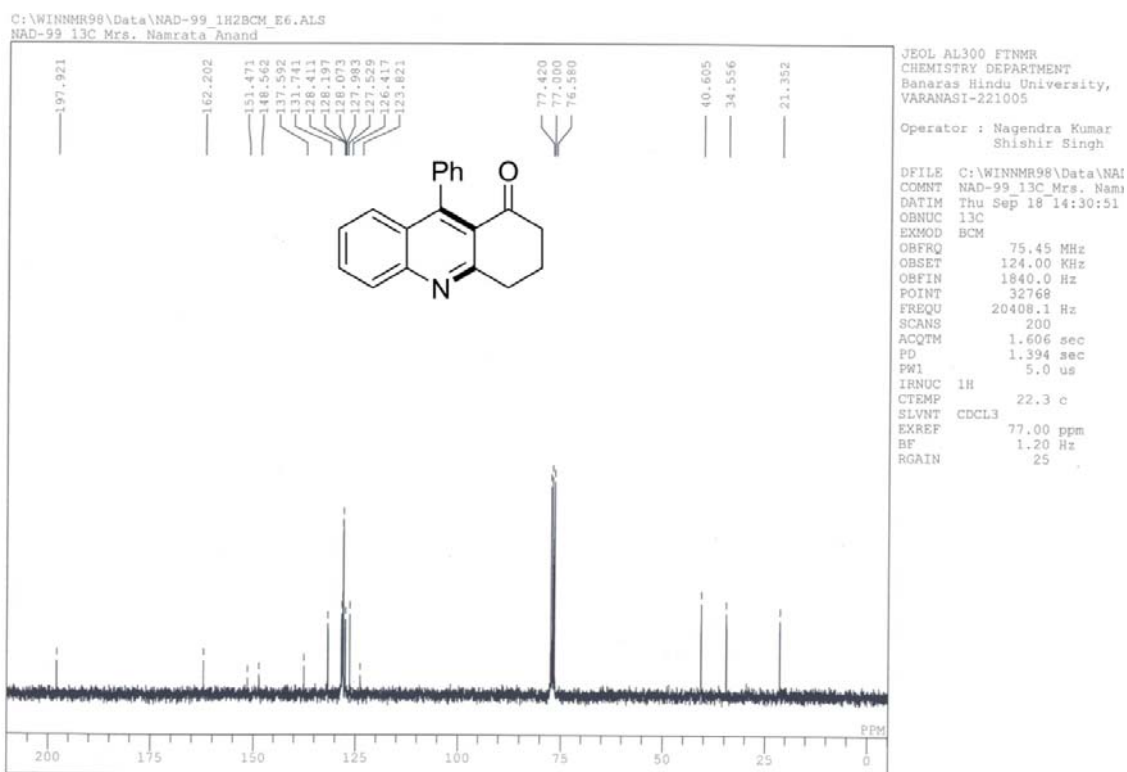

## <sup>1</sup>H NMR of 3ae

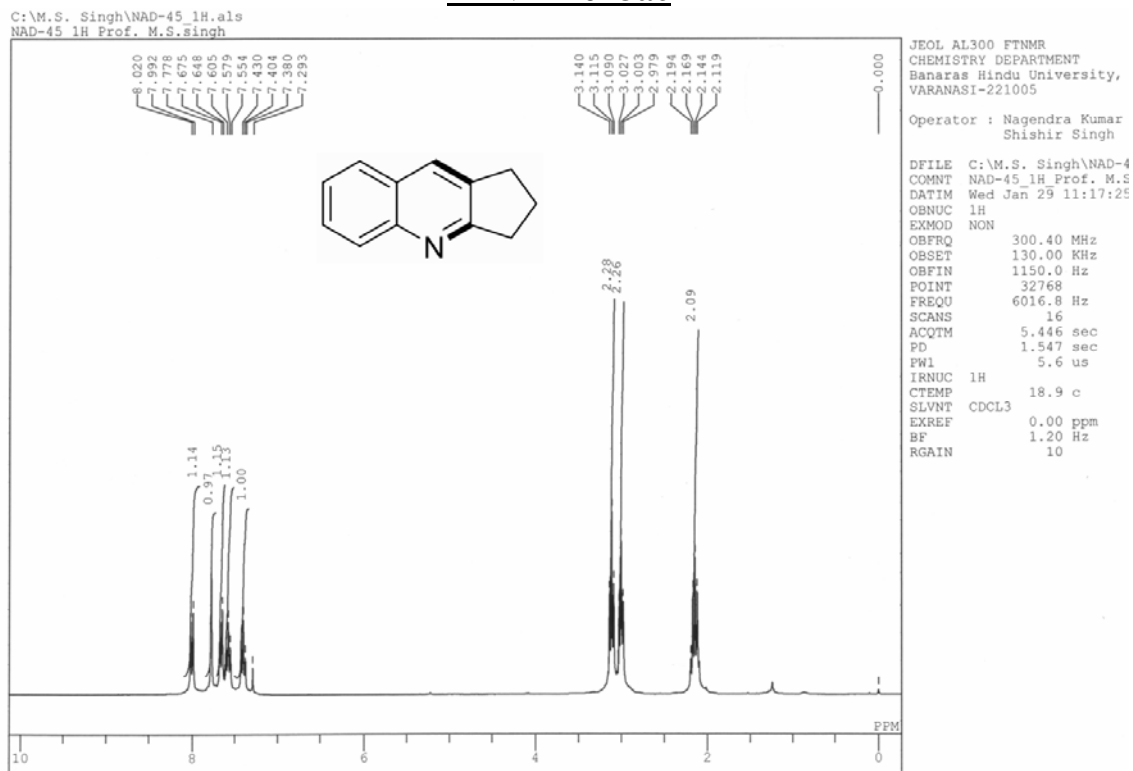

## <sup>13</sup>C NMR of 3ae

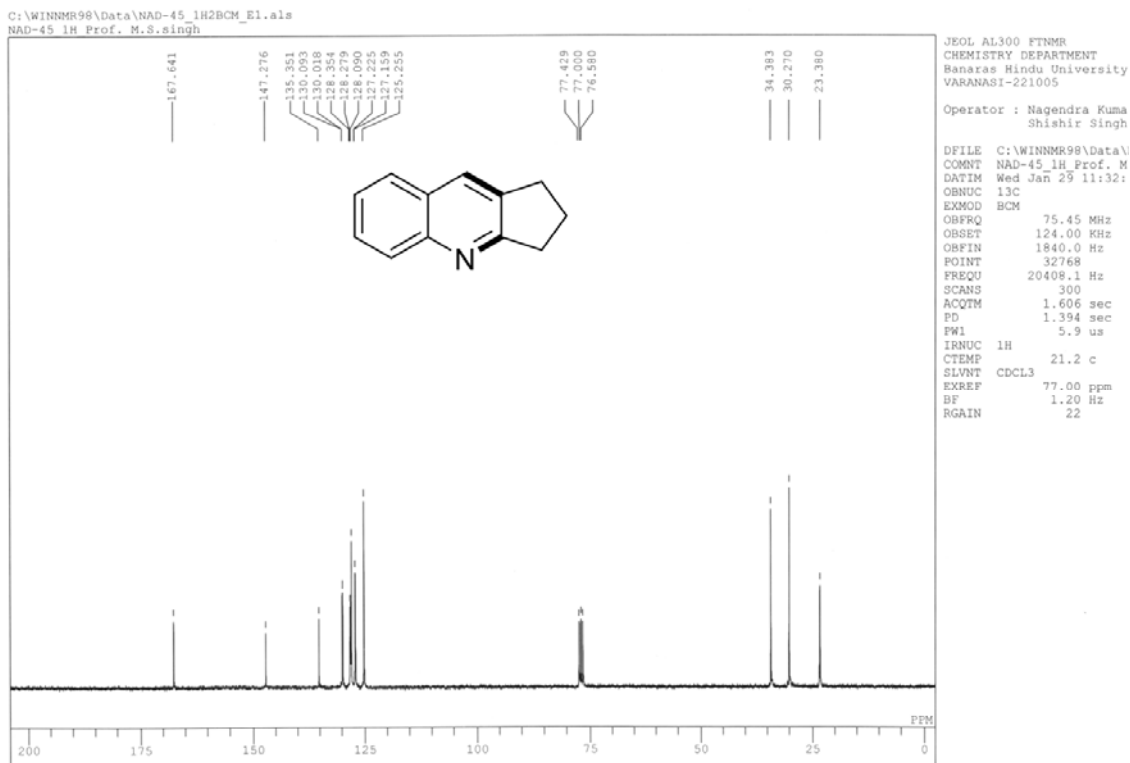

## <sup>1</sup>H NMR of 3af

C:\M.S. Singh\NAD-41\_1H.als  
NAD-41 1H Prof M. S. Singh

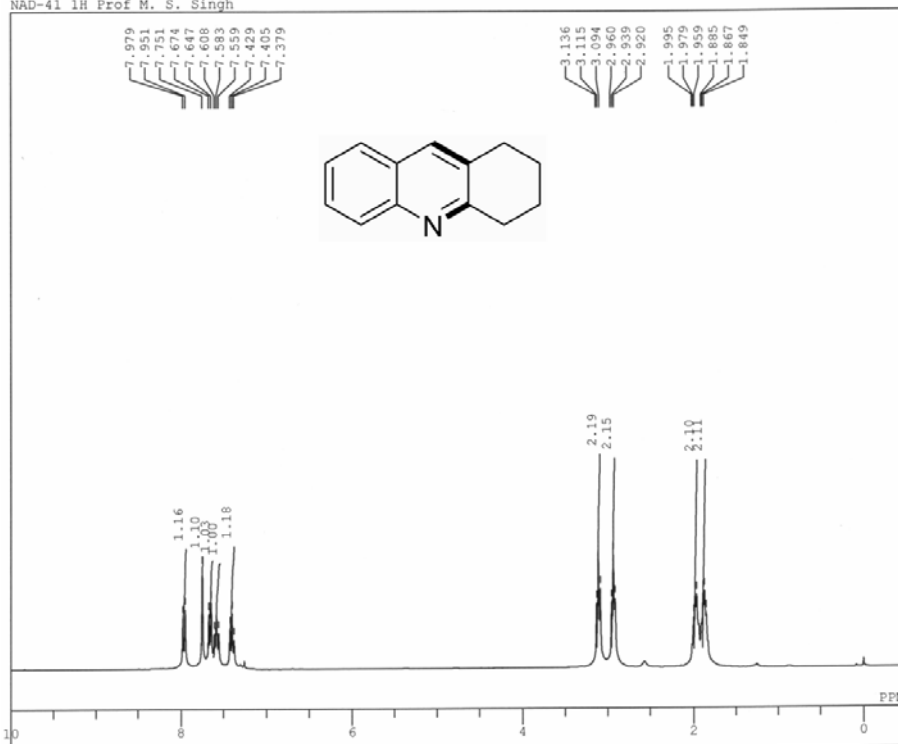

JEOL AL300 FTNMR  
CHEMISTRY DEPARTMENT  
Banaras Hindu University,  
VARANASI-221005

Operator : Nagendra Kumar  
Shishir Singh

DFILE C:\M.S. Singh\NAD-4  
COMNT NAD-41\_1H\_Prof M. S  
DATIM Mon Jan 13 17:51:08  
OBNUC 1H  
EXMOD NON  
OBFREQ 300.40 MHz  
OBSET 130.00 KHz  
OBFIN 1150.0 Hz  
POINT 32768  
FREQU 9505.7 Hz  
SCANS 8  
ACQTM 3.447 sec  
PD 1.547 sec  
PW1 5.2 us  
TRNUC 1H  
CTEMP 20.4 c  
SLVNT CDCL3  
EXREF 0.00 ppm  
BF 1.20 Hz  
RGAIN 14

## <sup>13</sup>C NMR of 3af

C:\WINNMR98\COMMON\DEFAULT.ALS  
NAD-41 13C Prof.M.S.Singh

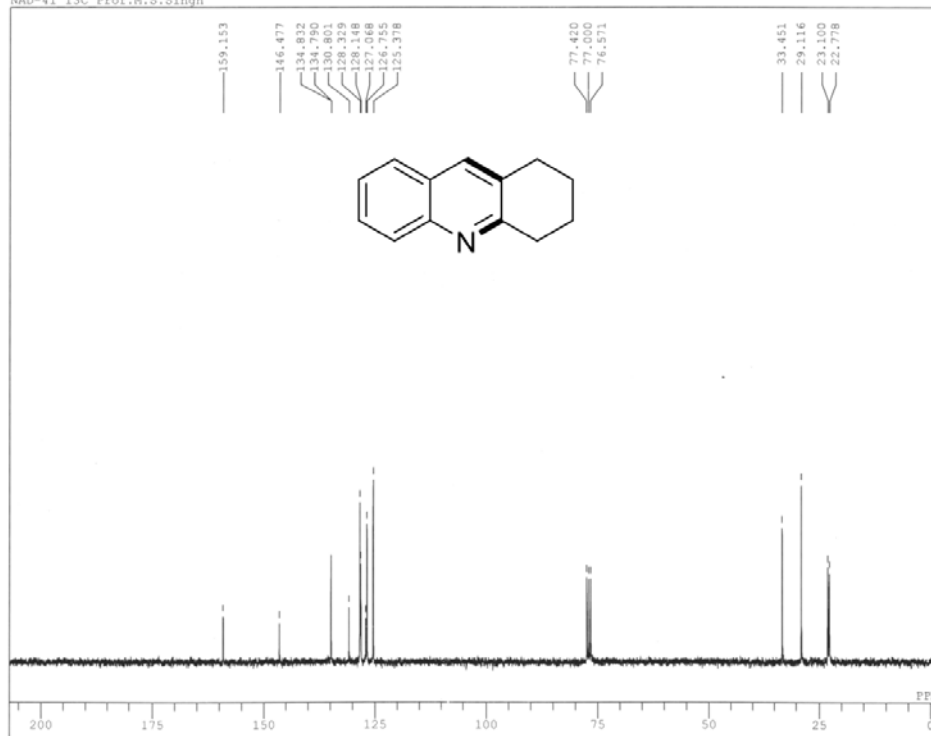

JEOL AL300 FTNMR  
CHEMISTRY DEPARTMENT  
Banaras Hindu University  
VARANASI-221005

Operator : Nagendra Kuma  
Shishir Singh

DFILE C:\WINNMR98\COMMC  
COMNT NAD-41\_13C\_Prof.M  
DATIM Mon Jan 27 10:34:  
OBNUC 13C  
EXMOD BCM  
OBFREQ 75.45 MHz  
OBSET 124.00 KHz  
OBFIN 1840.0 Hz  
POINT 32768  
FREQU 20408.1 Hz  
SCANS 108  
ACQTM 1.606 sec  
PD 1.394 sec  
PW1 5.9 us  
TRNUC 13C  
CTEMP 24.4 c  
SLVNT CDCL3  
EXREF 77.00 ppm  
BF 1.20 Hz  
RGAIN 24

# <sup>1</sup>H NMR of 3ag

C:\M.S. Singh\NAD-80\_1H.als  
NAD-80 1H Mrs.Namrata Ananad

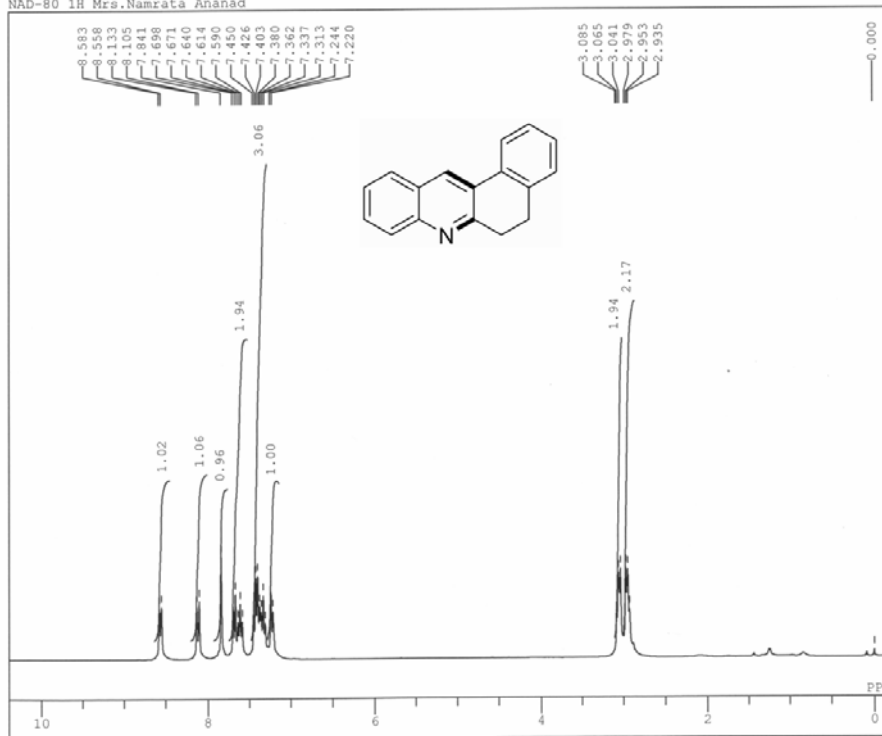

JEOL AL300 FTNMR  
CHEMISTRY DEPARTMENT  
Banaras Hindu University,  
VARANASI-221005

Operator : Nagendra Kumar  
Shishir Singh

DFILE C:\M.S. Singh\NAD-80  
COMNT NAD-80\_1H Mrs.Namrat  
DATIM Tue May 06 15:08:37  
OBNUC 1H  
EXMOD NON  
OBFRQ 300.40 MHz  
OBSET 130.00 KHz  
OBFIN 1150.0 Hz  
POINT 32768  
FREQU 6016.8 Hz  
SCANS 16  
ACQTM 5.446 sec  
PD 1.547 sec  
PW1 5.2 us  
IRNUC 1H  
CTEMP 22.7 c  
SLVNT CDCL3  
EXREF 0.00 ppm  
BF 1.20 Hz  
RGAIN 14

# <sup>13</sup>C NMR of 3ag

C:\WINNMR98\Data\NAD-80\_1H2BCM\_E3.als  
NAD-80 1H Mrs.Namrata Ananad

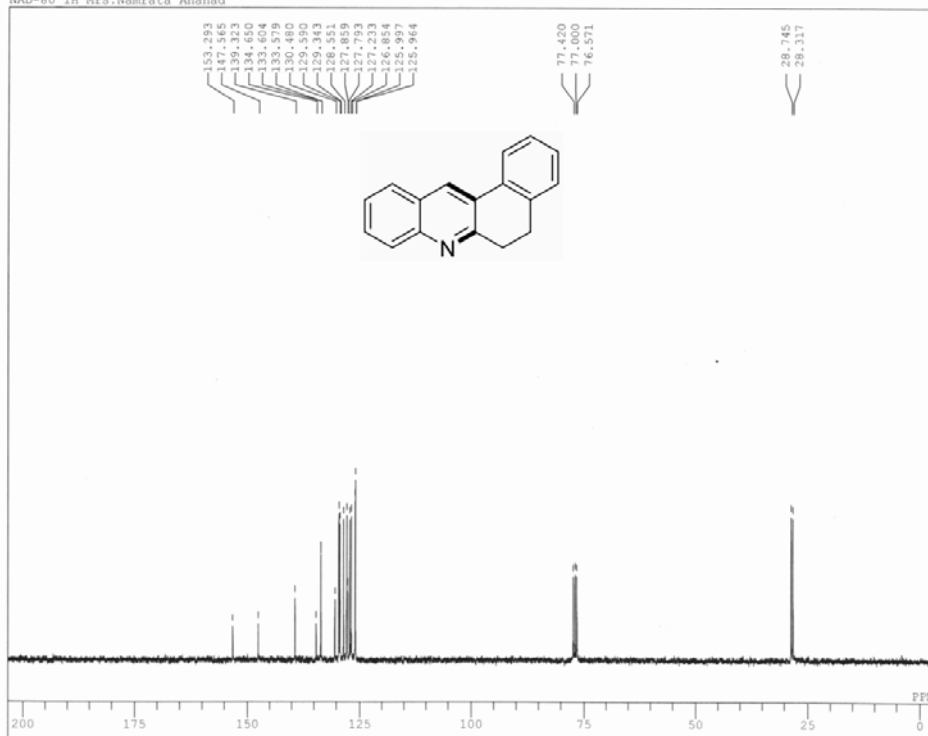

JEOL AL300 FTNMR  
CHEMISTRY DEPARTMENT  
Banaras Hindu Universit,  
VARANASI-221005

Operator : Nagendra Kum  
Shishir Singl

DFILE C:\WINNMR98\Data  
COMNT NAD-80\_1H Mrs.Nar  
DATIM Tue May 06 15:18  
OBNUC 13C  
EXMOD BCM  
OBFRQ 75.45 MHz  
OBSET 124.00 KHz  
OBFIN 1840.0 Hz  
POINT 32768  
FREQU 20408.1 Hz  
SCANS 200  
ACQTM 1.606 sec  
PD 1.394 sec  
PW1 6.0 us  
IRNUC 1H  
CTEMP 24.6 c  
SLVNT CDCL3  
EXREF 77.00 ppm  
BF 1.20 Hz  
RGAIN 22

# <sup>1</sup>H NMR of 3be

C:\Namrata Anand\NAD-103\_1H.als  
NAD-103 1H Ms. Namrata

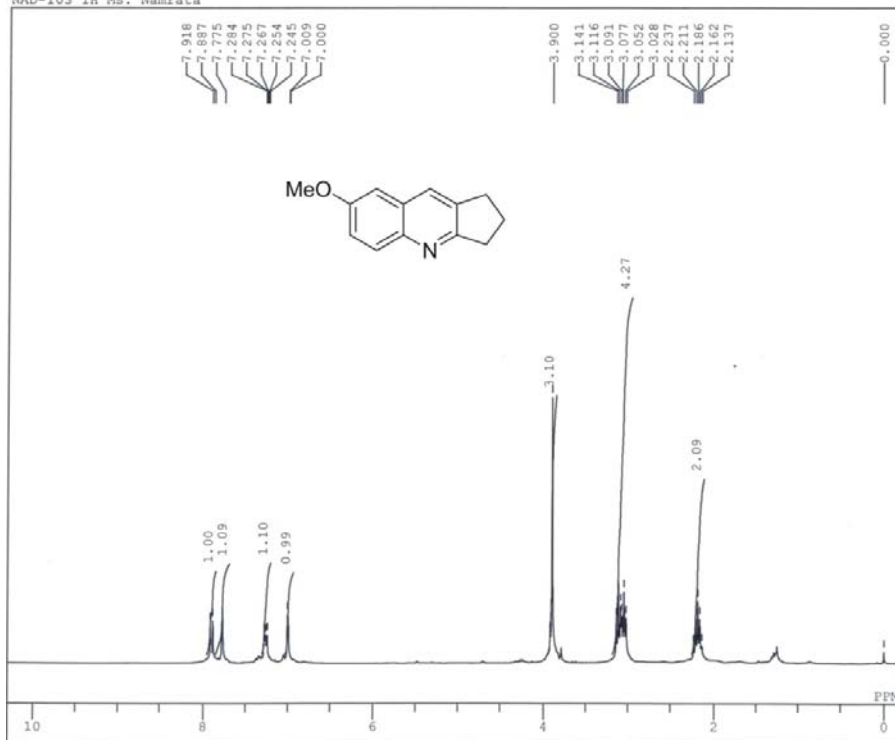

JEOL AL300 FTNMR  
CHEMISTRY DEPARTMENT  
Banaras Hindu University,  
VARANASI-221005

Operator : Nagendra Kumar  
Shishir Singh

DFILE C:\Namrata Anand\NAC  
COMNT NAD-103\_1H Ms. Namra  
DATIM Tue Sep 23 15:37:02  
OBNUC 1H  
EXMOD NON  
OBFRQ 300.40 MHz  
OBSET 130.00 KHz  
OBFIN 1150.0 Hz  
POINT 32768  
FREQU 9505.7 Hz  
SCANS 33  
ACQTM 3.447 sec  
PD 1.547 sec  
PW1 5.2 us  
IRNUC 1H  
CTEMP 20.6 c  
SLVNT CDCL3  
EXREF 0.00 ppm  
BF 1.20 Hz  
RGAIN 14

# <sup>13</sup>C NMR of 3be

C:\Namrata Anand\NAD-103\_13C.als  
NAD-103 13C Ms. Namrata

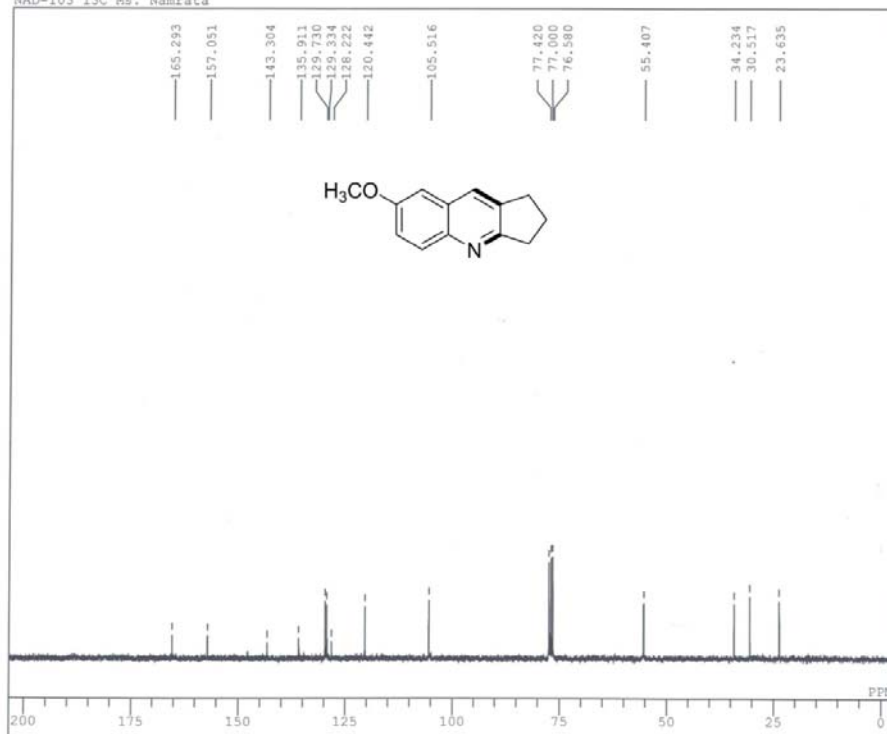

JEOL AL300 FTNMR  
CHEMISTRY DEPARTMENT  
Banaras Hindu University,  
VARANASI-221005

Operator : Nagendra Kumar  
Shishir Singh

DFILE C:\Namrata Anand\NAC  
COMNT NAD-103\_13C Ms. Namr  
DATIM Tue Sep 23 15:50:20  
OBNUC 13C  
EXMOD BCM  
OBFRQ 75.45 MHz  
OBSET 124.00 KHz  
OBFIN 1840.0 Hz  
POINT 32768  
FREQU 20408.1 Hz  
SCANS 209  
ACQTM 1.606 sec  
PD 1.394 sec  
PW1 5.0 us  
IRNUC 1H  
CTEMP 21.5 c  
SLVNT CDCL3  
EXREF 77.00 ppm  
BF 1.20 Hz  
RGAIN 24

# <sup>1</sup>H NMR of 3ce

C:\Namrata Anand\NAD-88 1H.als  
NAD-88 1H Mrs.Namrata Anand

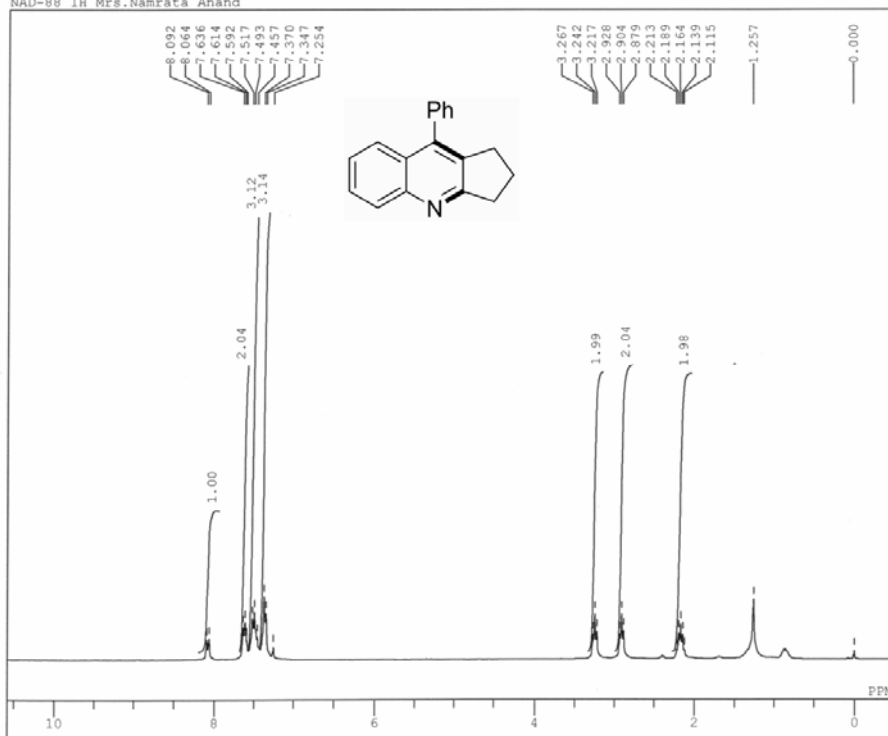

JEOL AL300 FTNMR  
CHEMISTRY DEPARTMENT  
Banaras Hindu University,  
VARANASI-221005

Operator : Nagendra Kumar  
Shishir Singh

DFILE C:\Namrata Anand\NAD  
COMNT NAD-88 1H Mrs.Namrat  
DATIM Fri Jul 25 11:15:49  
OBNUC 1H  
EXMOD NON  
OBFRQ 300.40 MHz  
OBSETE 130.00 KHz  
OBFIN 1150.0 Hz  
POINT 32768  
FREQU 9505.7 Hz  
SCANS 12  
ACQTM 3.447 sec  
PD 1.547 sec  
PW1 5.2 us  
IRNUC 1H  
CTEMP 22.1 c  
SLVNT CDCL3  
EXREF 0.00 ppm  
BF 1.20 Hz  
RGAIN 17

# <sup>13</sup>C NMR of 3ce

C:\WINNMR99\COMMON\DEFAULT.ALS  
NAD-88 13C Mrs.Namrata Anand

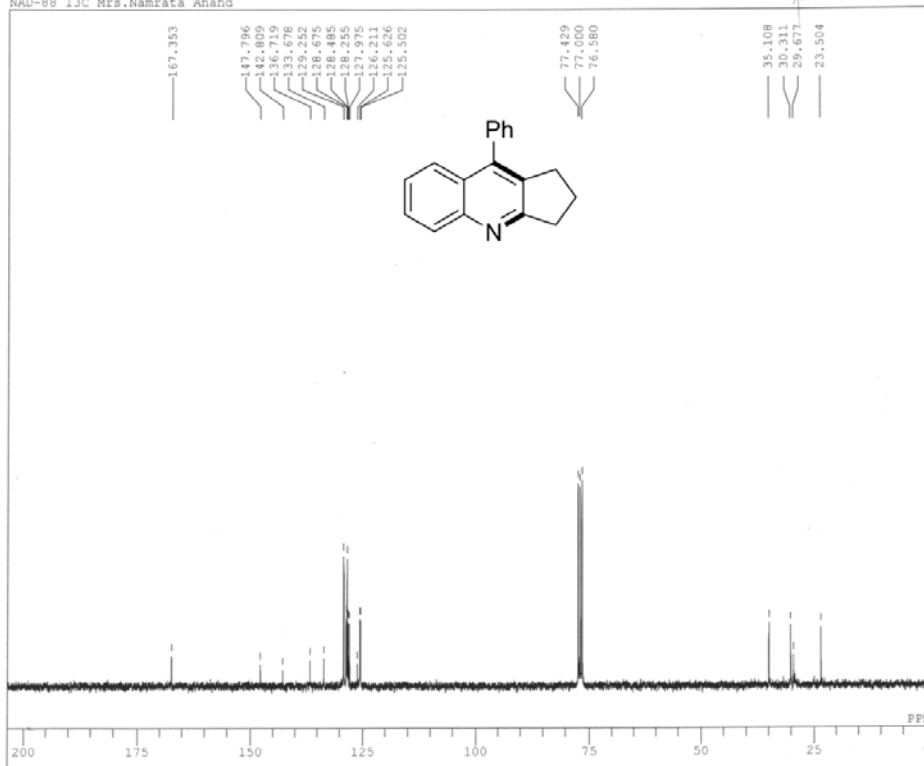

JEOL AL300 FTNMR  
CHEMISTRY DEPARTMENT  
Banaras Hindu Universit  
VARANASI-221005

Operator : Nagendra Kum  
Shishir Sing

DFILE C:\WINNMR99\COMM  
COMNT NAD-88 13C Mrs.N  
DATIM Fri Jul 25 11:10  
OBNUC 13C  
EXMOD BCM  
OBFRQ 75.45 MHz  
OBSETE 124.00 KHz  
OBFIN 1840.0 Hz  
POINT 32768  
FREQU 20408.1 Hz  
SCANS 596  
ACQTM 1.606 sec  
PD 1.394 sec  
PW1 6.0 us  
IRNUC 1H  
CTEMP 23.7 c  
SLVNT CDCL3  
EXREF 77.00 ppm  
BF 1.20 Hz  
RGAIN 24



# <sup>1</sup>H NMR of 3ah

C:\M.S. Singh\NAD-42 1H.als  
NAD-42 1H Prof.M.S.Singh

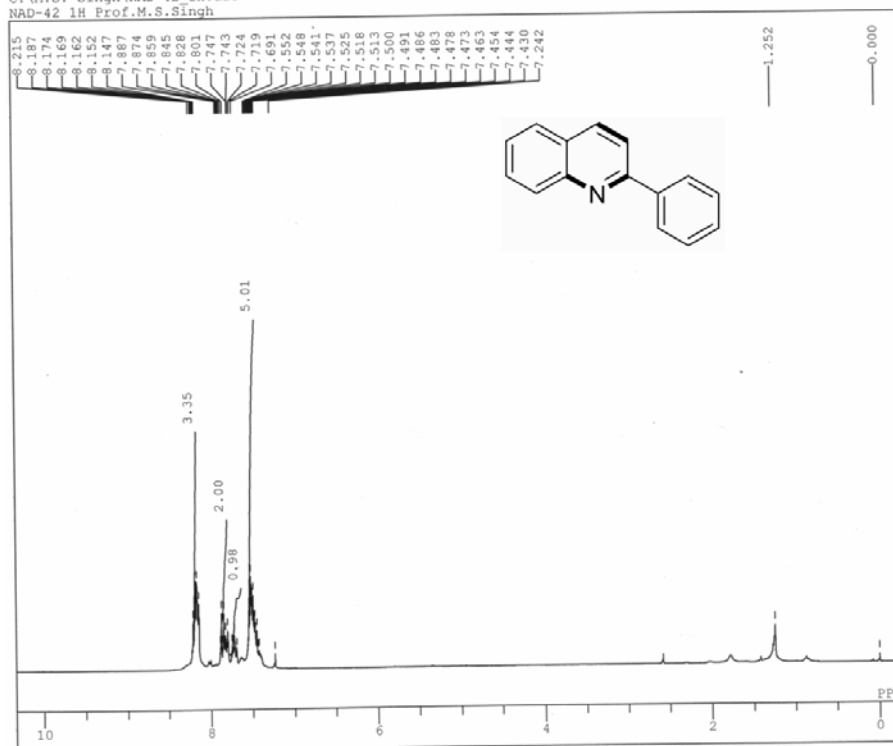

JEOL AL300 FTNMR  
CHEMISTRY DEPARTMENT  
Banaras Hindu University,  
VARANASI-221005

Operator : Nagendra Kumar  
Shishir Singh

DFILE C:\M.S. Singh\NAD-42  
COMNT NAD-42 1H Prof.M.S.S  
DATIM Thu Jan 23 16:04:27  
OBNUC 1H  
EXMOD NON  
OBFRQ 300.40 MHz  
OBSET 130.00 KHz  
OBFIN 1150.0 Hz  
POINT 32768  
FREQU 9523.8 Hz  
SCANS 16  
ACQTM 3.441 sec  
PD 1.547 sec  
PW1 5.2 us  
IRNUC 1H  
CTEMP 19.3 c  
SLVNT CDCL3  
EXREF 0.00 ppm  
BF 0.12 Hz  
RGAIN 15

# <sup>13</sup>C NMR of 3ah

C:\WINNMR98\COMMON\DEFAULT.ALS  
NAD-42 13C Prof.M.S.Singh

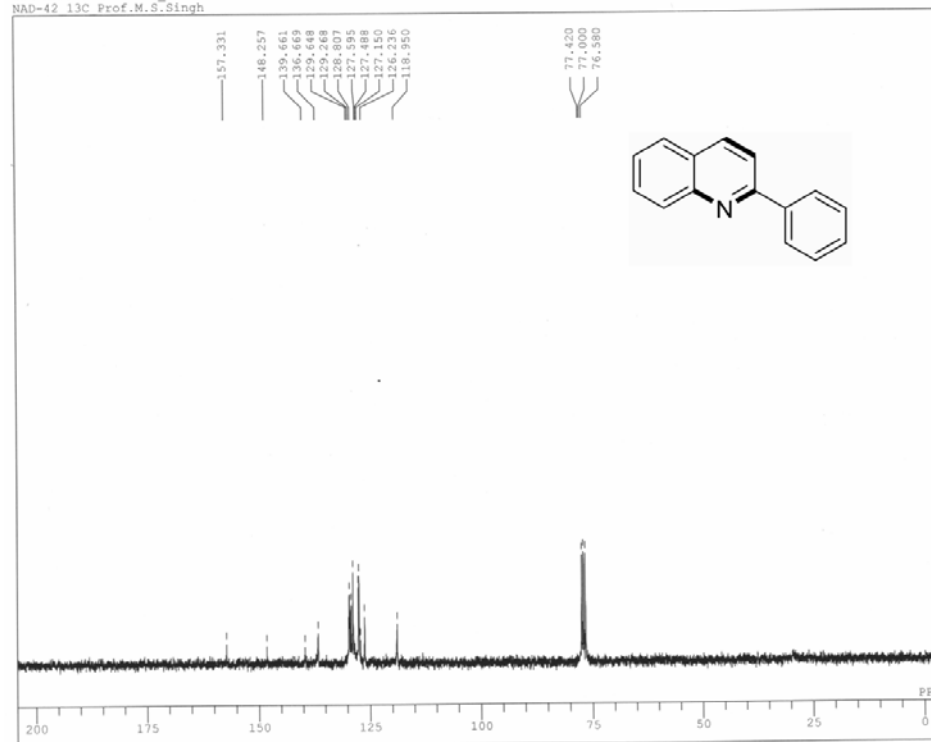

JEOL AL300 FTNMR  
CHEMISTRY DEPARTMENT  
Banaras Hindu University  
VARANASI-221005

Operator : Nagendra Kuma  
Shishir Singh

DFILE C:\WINNMR98\COMMO  
COMNT NAD-42 13C Prof.M  
DATIM Thu Jan 23 17:24:  
OBNUC 13C  
EXMOD BCM  
OBFRQ 75.45 MHz  
OBSET 124.00 KHz  
OBFIN 1840.0 Hz  
POINT 32768  
FREQU 20408.1 Hz  
SCANS 231  
ACQTM 1.606 sec  
PD 1.394 sec  
PW1 5.9 us  
IRNUC 1H  
CTEMP 22.1 c  
SLVNT CDCL3  
EXREF 77.00 ppm  
BF 1.22 Hz  
RGAIN 23

# <sup>1</sup>H NMR of 3ai

C:\Namrata\NAD-74\_1H.als  
NAD-74 1H Mrs.Namrata anand

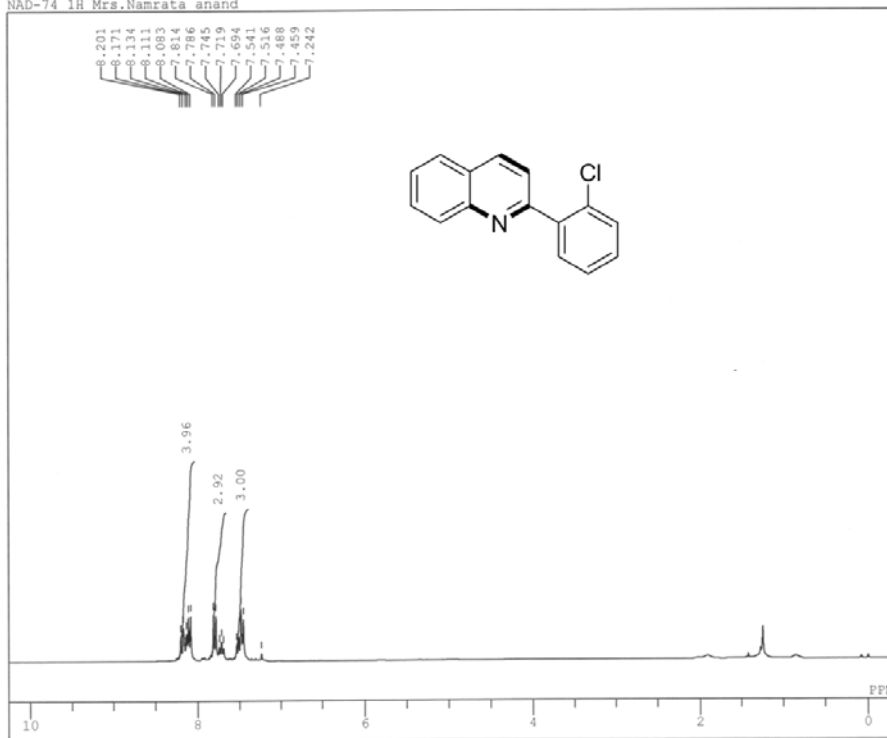

JEOL AL300 FTNMR  
CHEMISTRY DEPARTMENT  
Banaras Hindu University,  
VARANASI-221005

Operator : Nagendra Kumar  
Shishir Singh

DFILE C:\Namrata\NAD-74\_1H  
COMNT NAD-74\_1H Mrs.NamFat  
DATIM Tue Aug 12 11:52:22  
1H  
OBNUC 1H  
EXMOD NON  
OBFRQ 300.40 MHz  
OBSET 130.00 KHz  
OBFIN 1150.0 Hz  
POINT 32768  
FREQU 6016.8 Hz  
SCANS 16  
ACQTM 5.446 sec  
PD 1.547 sec  
PW1 5.2 us  
IRNUC 1H  
CTEMP 21.7 c  
SLVNT CDCL3  
EXREF 0.00 ppm  
BF 1.20 Hz  
RGAIN 15

# <sup>13</sup>C NMR of 3ai

C:\WINNMR98\Data\NAD-74\_1H2BCM\_E3.als  
NAD-74 1H Mrs.Namrata anand

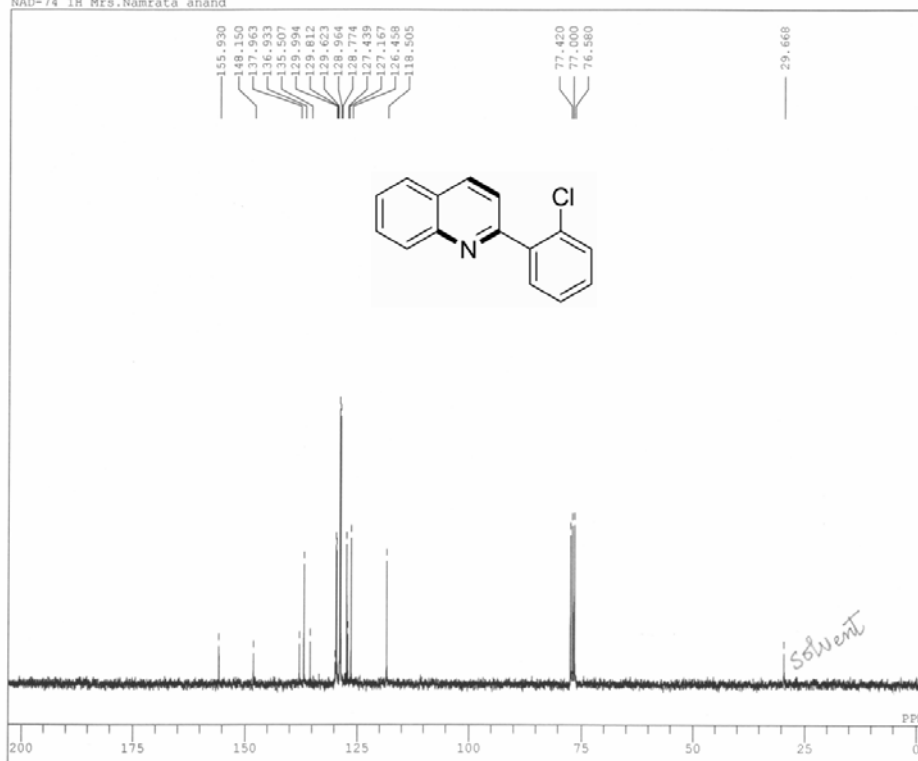

JEOL AL300 FTNMR  
CHEMISTRY DEPARTMENT  
Banaras Hindu University,  
VARANASI-221005

Operator : Nagendra Kum  
Shishir Sing

DFILE C:\WINNMR98\Data  
COMNT NAD-74\_1H Mrs.Na  
DATIM Tue Aug 12 12:02  
13C  
EXMOD BCM  
OBFRQ 75.45 MHz  
OBSET 124.00 KHz  
OBFIN 1840.0 Hz  
POINT 32768  
FREQU 20408.1 Hz  
SCANS 200  
ACQTM 1.606 sec  
PD 1.394 sec  
PW1 6.0 us  
IRNUC 1H  
CTEMP 23.3 c  
SLVNT CDCL3  
EXREF 77.00 ppm  
BF 1.20 Hz  
RGAIN 24

# <sup>1</sup>H NMR of 3aj

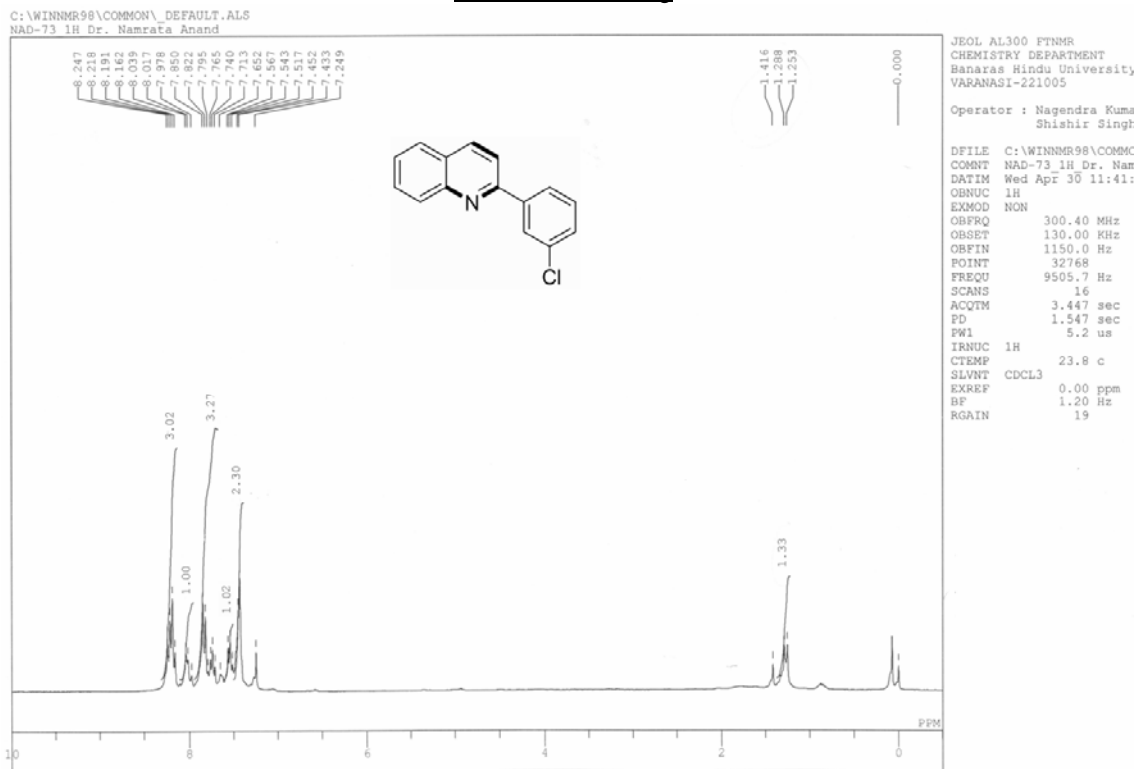

# <sup>13</sup>C NMR of 3aj

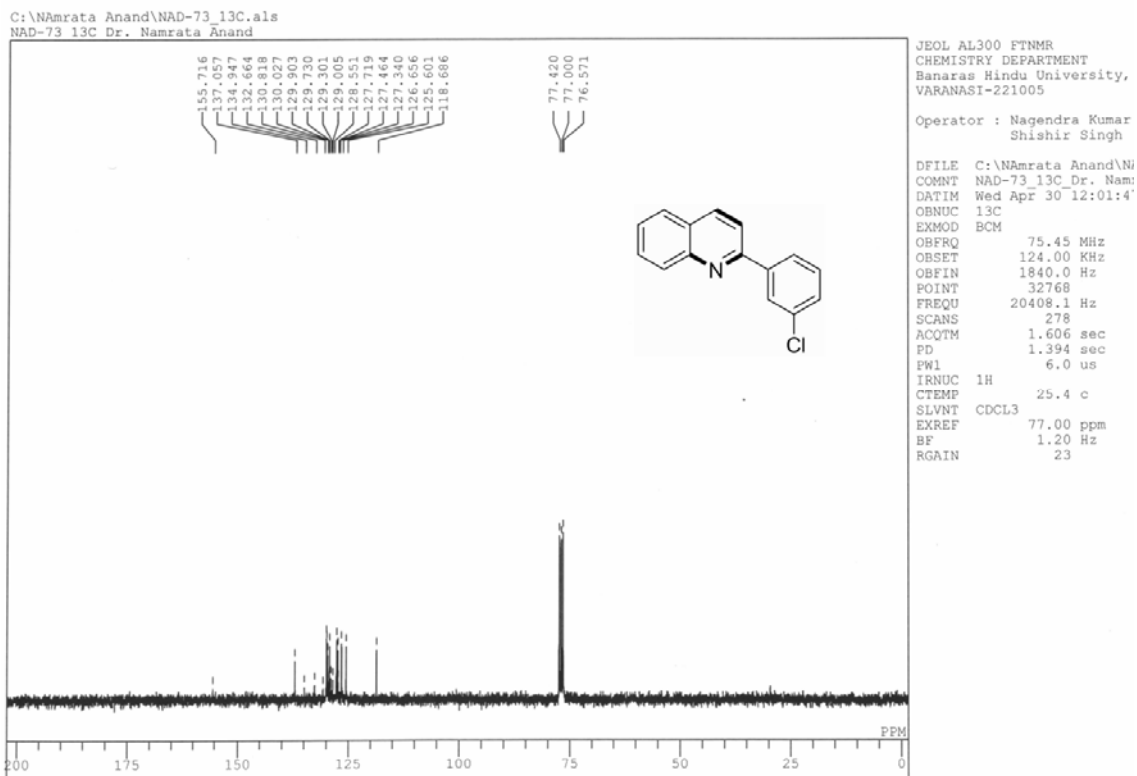

## <sup>1</sup>H NMR of 3ak

C:\M.S. Singh\NAD-72\_1H.als  
NAD-72 1H Prof. MSS

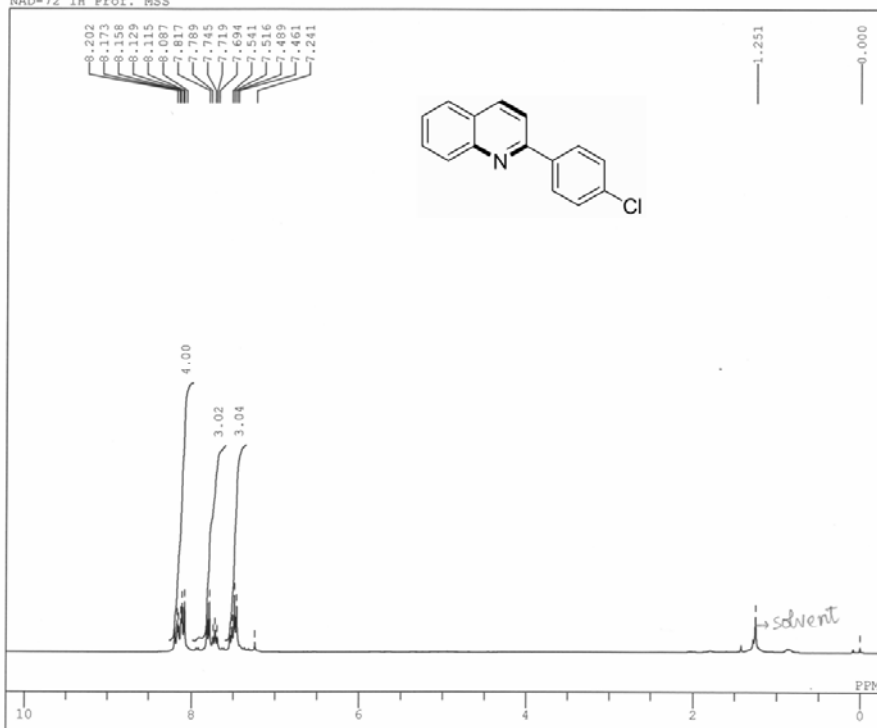

JEOL AL300 FTNMR  
CHEMISTRY DEPARTMENT  
Banaras Hindu University,  
VARANASI-221005  
Operator : Nagendra Kumar  
Shishir Singh  
DFILE C:\M.S. Singh\NAD-72  
COMNT NAD-72\_1H Prof. MSS  
DATIM Thu Apr 17 05:10:19  
OBNUC 1H  
EXMOD NON  
OBFRO 300.40 MHz  
OBSET 130.00 KHz  
OBFIN 1150.0 Hz  
POINT 32768  
FREQU 6016.8 Hz  
SCANS 16  
ACQTM 5.446 sec  
PD 1.547 sec  
PW1 5.2 us  
IRNUC 1H  
CTEMP 18.3 c  
SLVNT CDCL3  
EXREF 0.00 ppm  
BF 1.20 Hz  
RGAIN 14

## <sup>13</sup>C NMR of 3ak

C:\M.S. Singh\NAD-72\_13C.als  
NAD-72 1H Prof. MSS

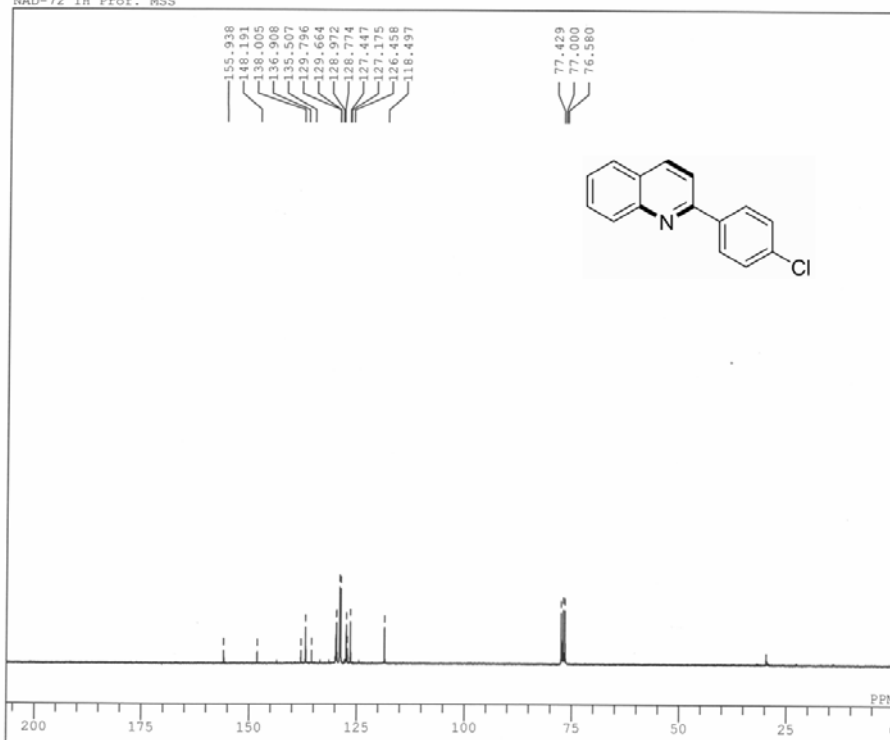

JEOL AL300 FTNMR  
CHEMISTRY DEPARTMENT  
Banaras Hindu University,  
VARANASI-221005  
Operator : Nagendra Kumar  
Shishir Singh  
DFILE C:\M.S. Singh\NAD-7  
COMNT NAD-72\_1H Prof. MSS  
DATIM Thu Apr 17 05:07:56  
OBNUC 13C  
EXMOD BCM  
OBFRO 75.45 MHz  
OBSET 124.00 KHz  
OBFIN 1840.0 Hz  
POINT 32768  
FREQU 20408.1 Hz  
SCANS 2000  
ACQTM 1.606 sec  
PD 1.394 sec  
PW1 6.0 us  
IRNUC 1H  
CTEMP 19.1 c  
SLVNT CDCL3  
EXREF 77.00 ppm  
BF 1.20 Hz  
RGAIN 23

# <sup>1</sup>H NMR of 3aI

C:\M.S. Singh\NAD-51\_1H.als  
NAD-51 1H Mrs.Namrata Anand

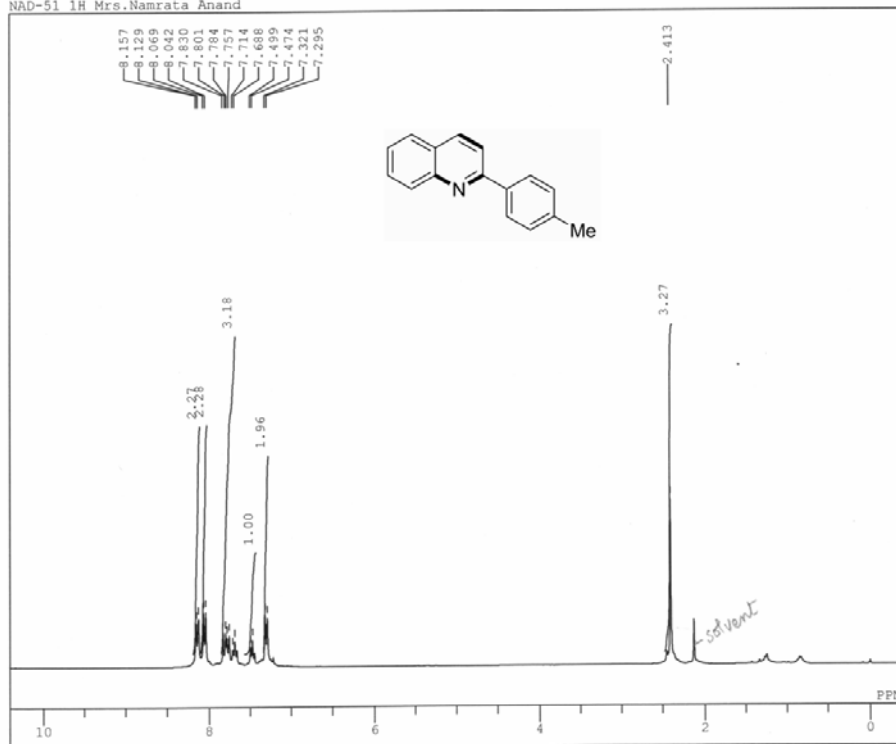

JEOL AL300 FTNMR  
CHEMISTRY DEPARTMENT  
Banaras Hindu University,  
VARANASI-221005

Operator : Nagendra Kumar  
Shishir Singh

DFILE C:\M.S. Singh\NAD-5  
COMNT NAD-51\_1H Mrs.Namra  
DATIM Thu Apr 17 17:13:42  
OBNUC 1H  
EXMOD NON  
OBFRQ 300.40 MHz  
OBSET 130.00 KHz  
OBFIN 1150.0 Hz  
POINT 32768  
FREQU 9505.7 Hz  
SCANS 37  
ACQTM 3.447 sec  
PD 1.547 sec  
FW1 5.2 us  
IRNUC 1H  
CTEMP 19.9 c  
SLVNT CDCL3  
EXREF 0.00 ppm  
BF 1.20 Hz  
RGAIN 14

# <sup>13</sup>C NMR of 3aI

C:\WINNMR98\COMMON\DEFAULT.ALS  
NAD-51 13C Mrs.Namrata Anand

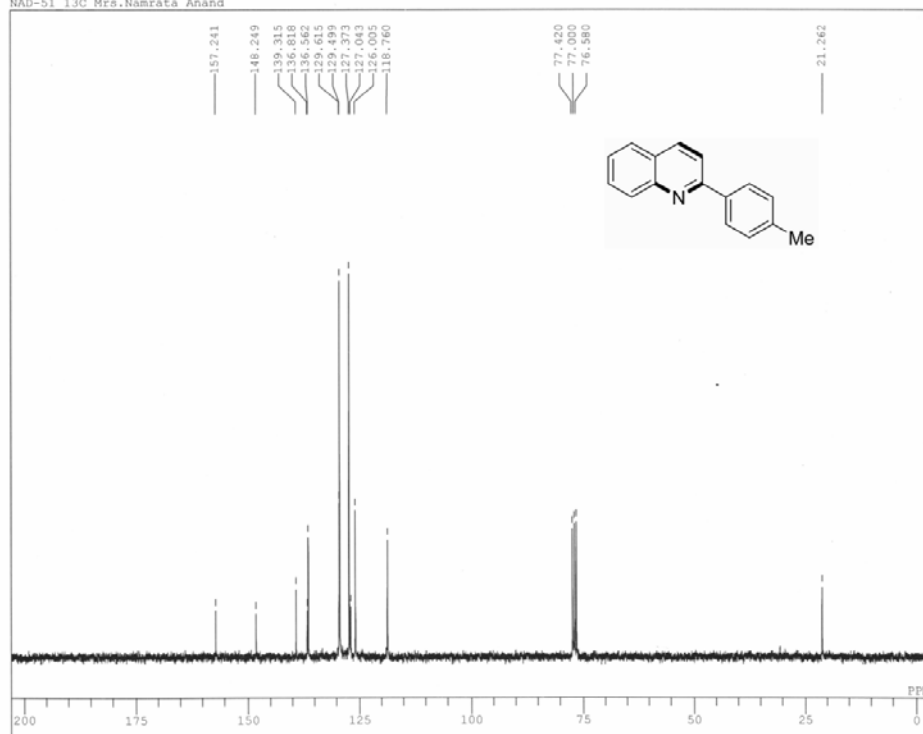

JEOL AL300 FTNMR  
CHEMISTRY DEPARTMENT  
Banaras Hindu University  
VARANASI-221005

Operator : Nagendra Kuma  
Shishir Singh

DFILE C:\WINNMR98\COMMON  
COMNT NAD-51 13C Mrs.Na  
DATIM Thu Apr 17 17:26:  
OBNUC 13C  
EXMOD BCM  
OBFRQ 75.45 MHz  
OBSET 124.00 KHz  
OBFIN 1840.0 Hz  
POINT 32768  
FREQU 20408.1 Hz  
SCANS 215  
ACQTM 1.606 sec  
PD 1.394 sec  
FW1 6.0 us  
IRNUC 1H  
CTEMP 21.7 c  
SLVNT CDCL3  
EXREF 77.00 ppm  
DF 1.20 Hz  
RGAIN 22

## <sup>1</sup>H NMR of 3am

C:\WINNMR98\COMMON\\_DEFAULT.ALS  
NAD-78 1H Mrs.Namrata Anand

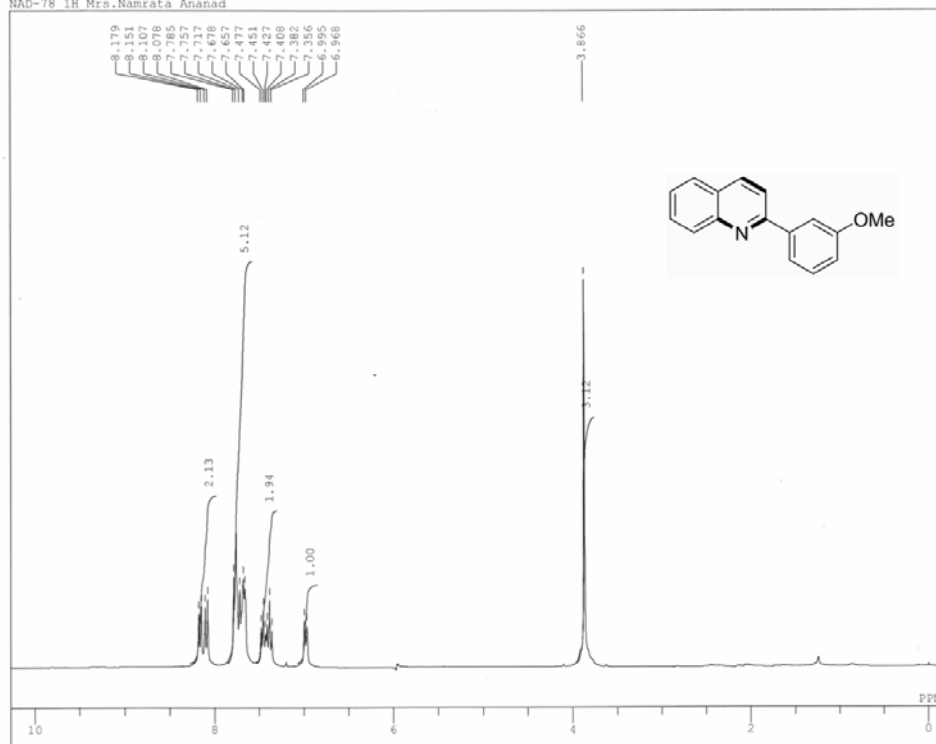

JEOL AL300 FTNMR  
CHEMISTRY DEPARTMENT  
Banaras Hindu University,  
VARANASI-221005

Operator : Nagendra Kumar  
Shishir Singh

DFILE C:\WINNMR98\COMMON  
COMNT NAD-78 1H Mrs.Nar  
DATIM Tue Apr 29 12:12:  
OBNUC 1H  
EXMOD NON  
OBFRQ 300.40 MHz  
OBSET 130.00 KHz  
OBFIN 1150.0 Hz  
POINT 32768  
FREQU 9505.7 Hz  
SCANS 23  
AQTM 3.447 sec  
PD 1.547 sec  
FW1 5.2 us  
IRNUC 1H  
CTEMP 22.5 c  
SIVNT CDCL3  
EXREF 0.00 ppm  
BF 1.20 Hz  
RGAIN 11

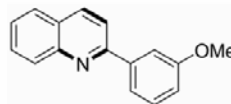

## <sup>13</sup>C NMR of 3am

C:\NAmrata Anand\NAD-78 13C.als  
NAD-78 13C Mrs.Namrata Anand

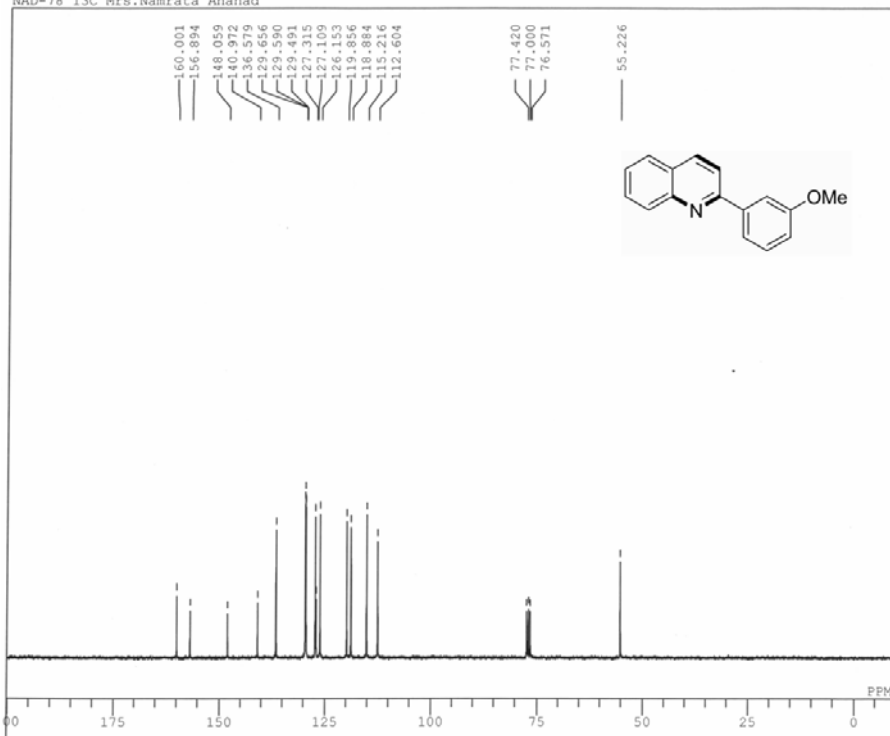

JEOL AL300 FTNMR  
CHEMISTRY DEPARTMENT  
Banaras Hindu University,  
VARANASI-221005

Operator : Nagendra Kumar  
Shishir Singh

DFILE C:\NAmrata Anand\NAD  
COMNT NAD-78 13C Mrs.Namra  
DATIM Tue Apr 29 12:02:36  
OBNUC 13C  
EXMOD BCM  
OBFRQ 75.45 MHz  
OBSET 124.00 KHz  
OBFIN 1840.0 Hz  
POINT 32768  
FREQU 20408.1 Hz  
SCANS 309  
AQTM 1.606 sec  
PD 1.394 sec  
FW1 6.0 us  
IRNUC 1H  
CTEMP 24.1 c  
SIVNT CDCL3  
EXREF 77.00 ppm  
BF 1.20 Hz  
RGAIN 23

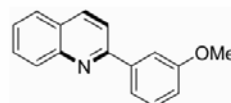

## <sup>1</sup>H NMR of 3an

C:\M.S. Singh\NAD-57\_1H.als  
NAD-57 1H Prof M. S. Singh

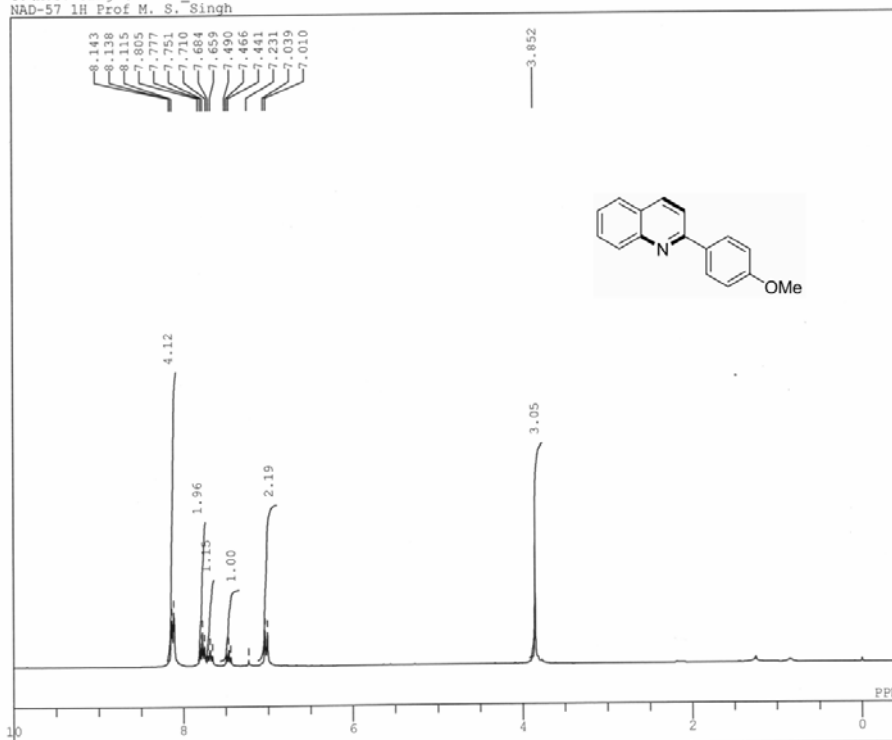

JEOL AL300 FTNMR  
CHEMISTRY DEPARTMENT  
Banaras Hindu University,  
VARANASI-221005

Operator : Nagendra Kumar  
Shishir Singh

DFILE C:\M.S. Singh\NAD-57  
COMNT NAD-57\_1H\_Prof M. S.  
DATIM Wed Apr 02 15:49:08  
OBNUC 1H  
EXMOD NON  
OBFRQ 300.40 MHz  
OBSET 130.00 KHz  
OBFIN 1150.0 Hz  
POINT 32768  
FREQU 9505.7 Hz  
SCANS 63  
ACQTM 3.447 sec  
PD 1.547 sec  
PW1 5.2 us  
IRNUC 1H  
CTEMP 16.1 c  
SLVNT CDCL3  
EXREF 0.00 ppm  
BF 1.20 Hz  
RGAIN 15

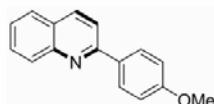

## <sup>13</sup>C NMR of 3an

C:\M.S. Singh\NAD-57\_13C.als  
NAD-57 13C Prof M. S. Singh

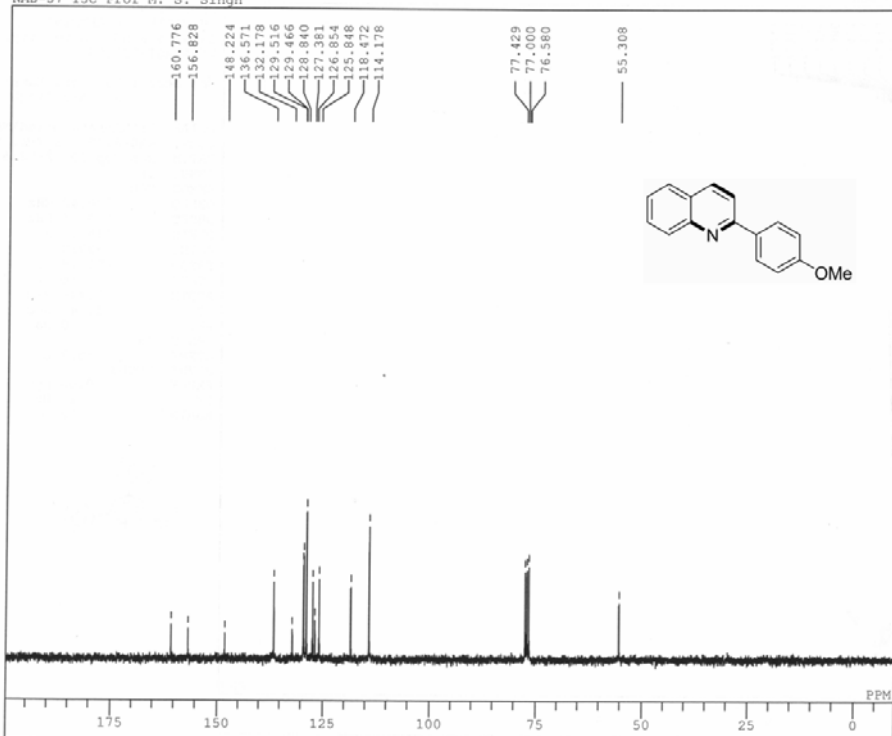

JEOL AL300 FTNMR  
CHEMISTRY DEPARTMENT  
Banaras Hindu University,  
VARANASI-221005

Operator : Nagendra Kumar  
Shishir Singh

DFILE C:\M.S. Singh\NAD-57  
COMNT NAD-57\_13C\_Prof M. S.  
DATIM Wed Apr 02 15:41:55  
OBNUC 13C  
EXMOD BCM  
OBFRQ 75.45 MHz  
OBSET 124.00 KHz  
OBFIN 1840.0 Hz  
POINT 32768  
FREQU 20408.1 Hz  
SCANS 116  
ACQTM 1.606 sec  
PD 1.394 sec  
PW1 6.0 us  
IRNUC 1H  
CTEMP 17.9 c  
SLVNT CDCL3  
EXREF 77.00 ppm  
BF 1.20 Hz  
RGAIN 23

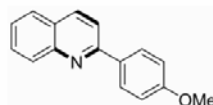

## <sup>1</sup>H NMR of 3ao

C:\M.S. Singh\NAD-60 1H.als  
NAD-60 1H Prof. M. S. Singh

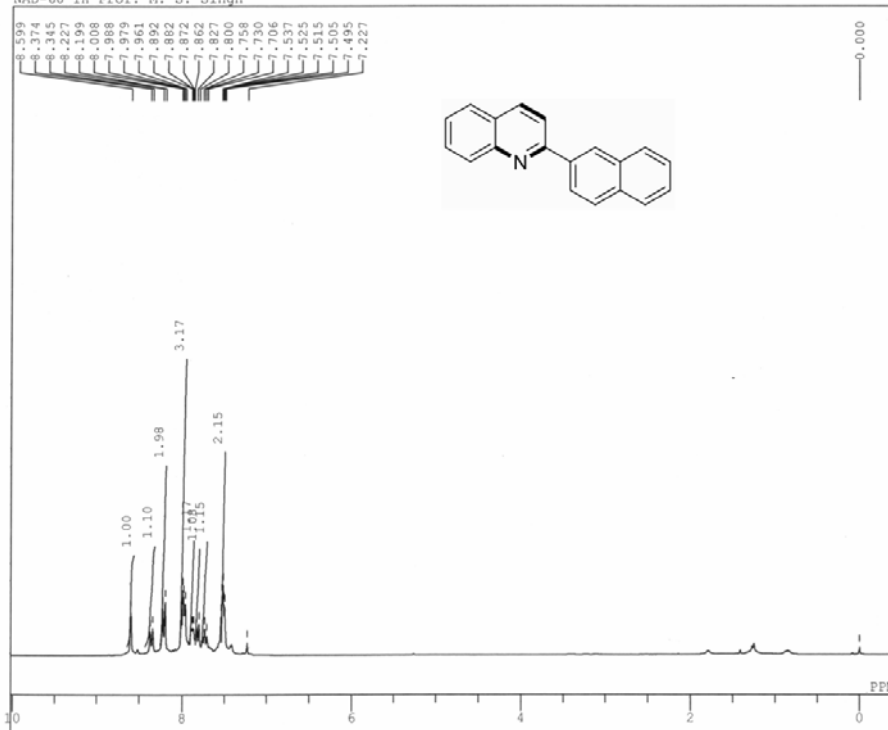

JEOL AL300 FTNMR  
CHEMISTRY DEPARTMENT  
Banaras Hindu University,  
VARANASI-221005

Operator : Nagendra Kumar  
Shishir Singh

DFILE C:\M.S. Singh\NAD-60  
COMNT NAD-60 1H Prof. M. S  
DATIM Fri Mar 28 04:14:56  
OBNUC 1H  
EXMOD NON  
OBFRQ 300.40 MHz  
OBSET 130.00 KHz  
OBFIN 1150.0 Hz  
POINT 32768  
FREQU 6016.8 Hz  
SCANS 16  
ACQTM 5.446 sec  
PD 1.547 sec  
PW1 5.2 us  
IRNUC 1H  
CTEMP 15.6 c  
SLVNT CDCL3  
EXREF 0.00 ppm  
BF 1.20 Hz  
RGAIN 15

## <sup>13</sup>C NMR of 3ao

C:\M.S. Singh\NAD-60 13C.als  
NAD-60 13C Prof. M. S. Singh

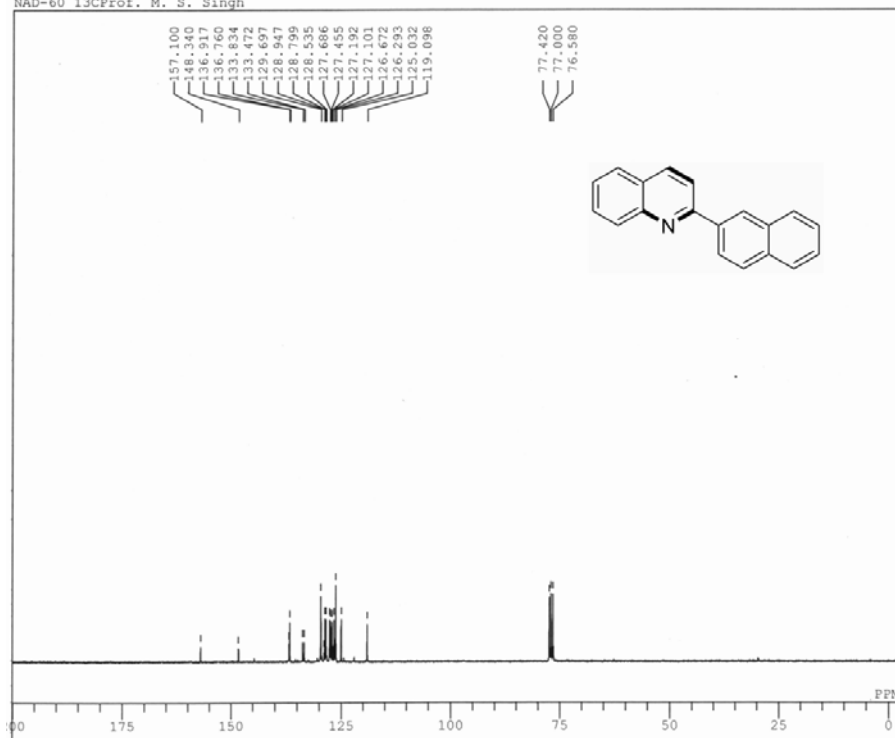

JEOL AL300 FTNMR  
CHEMISTRY DEPARTMENT  
Banaras Hindu University,  
VARANASI-221005

Operator : Nagendra Kumar  
Shishir Singh

DFILE C:\M.S. Singh\NAD-60  
COMNT NAD-60 13C Prof. M. S  
DATIM Fri Mar 28 04:12:26  
OBNUC 13C  
EXMOD BCM  
OBFRQ 75.45 MHz  
OBSET 124.00 KHz  
OBFIN 1840.0 Hz  
POINT 32768  
FREQU 20408.1 Hz  
SCANS 2000  
ACQTM 1.606 sec  
PD 1.394 sec  
PW1 6.0 us  
IRNUC 1H  
CTEMP 16.5 c  
SLVNT CDCL3  
EXREF 77.00 ppm  
BF 1.20 Hz  
RGAIN 24



# <sup>1</sup>H NMR of 3ap

C:\NAmrata Anand\NAD-54\_1H.als  
NAD-54\_1H Mrs.Namrata Anand

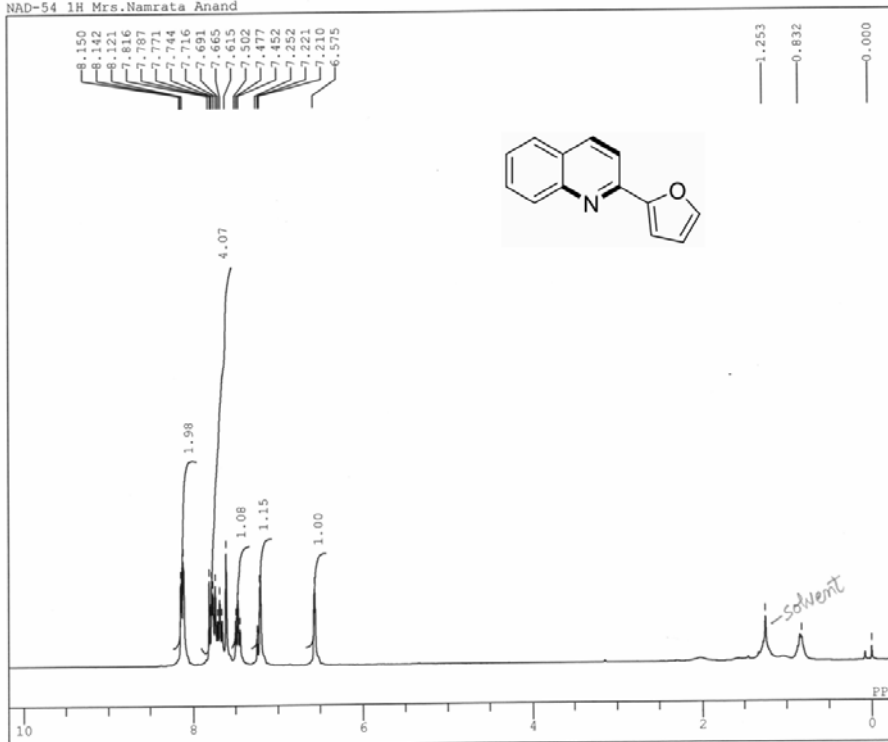

JEOL AL300 FTNMR  
CHEMISTRY DEPARTMENT  
Banaras Hindu University,  
VARANASI-221005

Operator : Nagendra Kumar  
Shishir Singh

DFILE C:\NAmrata Anand\NAI  
COMNT NAD-54\_1H Mrs.Namra  
DATIM Thu May 01 17:53:21  
OBNUC 1H  
EXMOD NON  
OBFREQ 300.40 MHz  
OBSET 130.00 KHz  
OBFIN 1150.0 Hz  
POINT 32768  
FREQU 6016.8 Hz  
SCANS 16  
ACQTM 5.446 sec  
PD 1.547 sec  
PW1 5.2 us  
IRNUC 1H  
CTEMP 24.8 c  
SLVNT CDCL3  
EXREF 0.00 ppm  
BF 1.20 Hz  
RGAIN 16

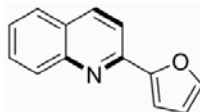

# <sup>13</sup>C NMR of 3ap

C:\NAmrata Anand\NAD-54\_13C.als  
NAD-54\_1H Mrs.Namrata Anand

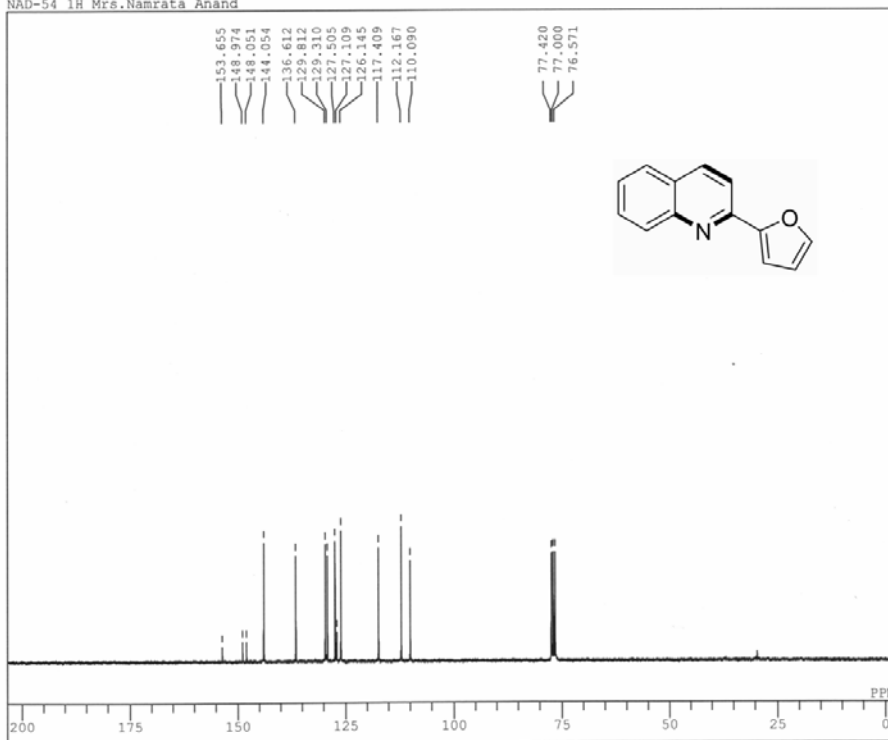

JEOL AL300 FTNMR  
CHEMISTRY DEPARTMENT  
Banaras Hindu University,  
VARANASI-221005

Operator : Nagendra Kumar  
Shishir Singh

DFILE C:\NAmrata Anand\NAI  
COMNT NAD-54\_1H Mrs.Namra  
DATIM Thu May 01 19:33:43  
OBNUC 13C  
EXMOD BCM  
OBFREQ 75.45 MHz  
OBSET 124.00 KHz  
OBFIN 1840.0 Hz  
POINT 32768  
FREQU 20408.1 Hz  
SCANS 2000  
ACQTM 1.606 sec  
PD 1.394 sec  
PW1 6.0 us  
IRNUC 1H  
CTEMP 24.1 c  
SLVNT CDCL3  
EXREF 77.00 ppm  
BF 1.20 Hz  
RGAIN 24

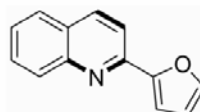

# <sup>1</sup>H NMR of 3aq

C:\M.S. Singh\NAD-47\_1H.als  
NAD-47 1H Prof. M. S. Singh

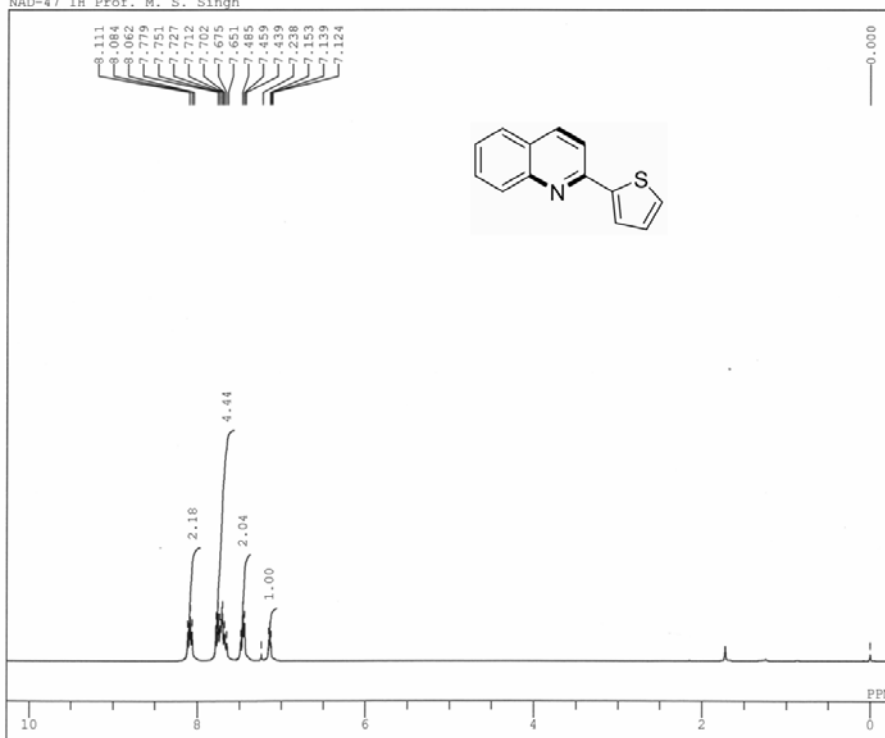

JEOL AL300 FTNMR  
CHEMISTRY DEPARTMENT  
Banaras Hindu University,  
VARANASI-221005

Operator : Nagendra Kumar  
Shishir Singh

DFILE C:\M.S. Singh\NAD-4  
COMNT NAD-47 1H Prof. M.  
DATIM Wed Feb 05 11:40:30  
OBNUC 1H  
EXMOD NON  
OBFRQ 300.40 MHz  
OBSET 130.00 KHz  
OBFIN 1150.0 Hz  
POINT 32768  
FREQU 9505.7 Hz  
SCANS 32  
ACQTM 3.447 sec  
PD 1.547 sec  
FW1 5.2 us  
IRNUC 1H  
CTEMP 20.7 c  
SLVNT CDCL3  
EXREF 0.00 ppm  
BF 1.20 Hz  
RGAIN 16

# <sup>13</sup>C NMR of 3aq

C:\WINNMR98\COMMON\_DEFAULT.ALS  
NAD-47 13C Prof. M. S. Singh

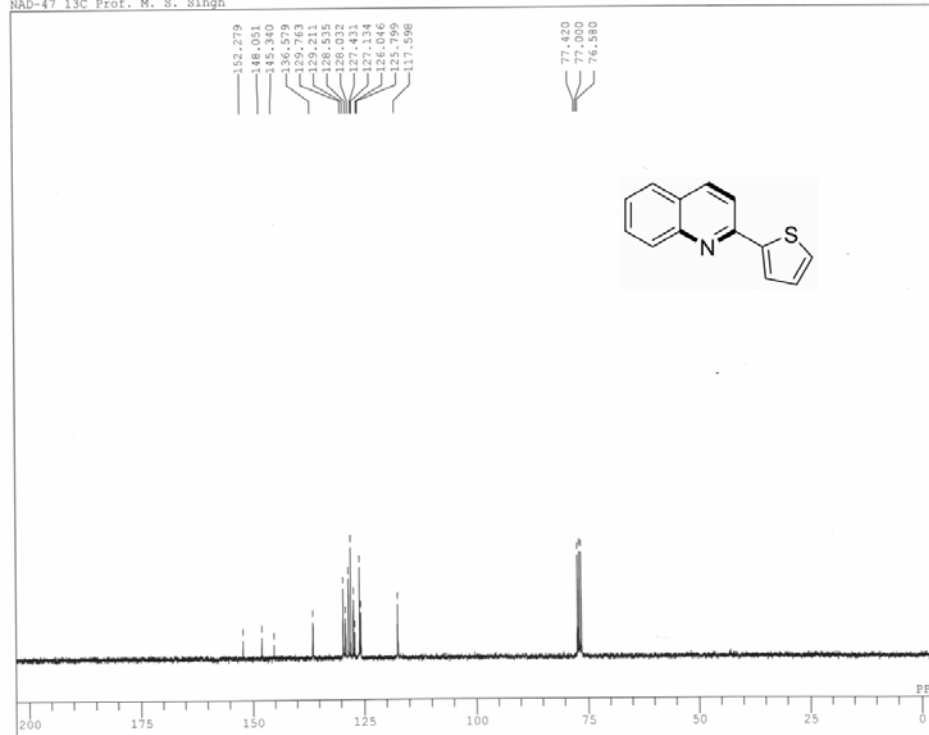

JEOL AL300 FTNMR  
CHEMISTRY DEPARTMENT  
Banaras Hindu University  
VARANASI-221005

Operator : Nagendra Kum  
Shishir Sing

DFILE C:\WINNMR98\COMM  
COMNT NAD-47 13C Prof.  
DATIM Wed Feb 05 11:35  
OBNUC 13C  
EXMOD BCM  
OBFRQ 75.45 MHz  
OBSET 124.00 KHz  
OBFIN 1840.0 Hz  
POINT 32768  
FREQU 20408.1 Hz  
SCANS 322  
ACQTM 1.606 sec  
PD 1.394 sec  
FW1 5.9 us  
IRNUC 1H  
CTEMP 20.1 c  
SLVNT CDCL3  
EXREF 77.00 ppm  
BF 1.20 Hz  
RGAIN 24

## <sup>1</sup>H NMR of 3ar

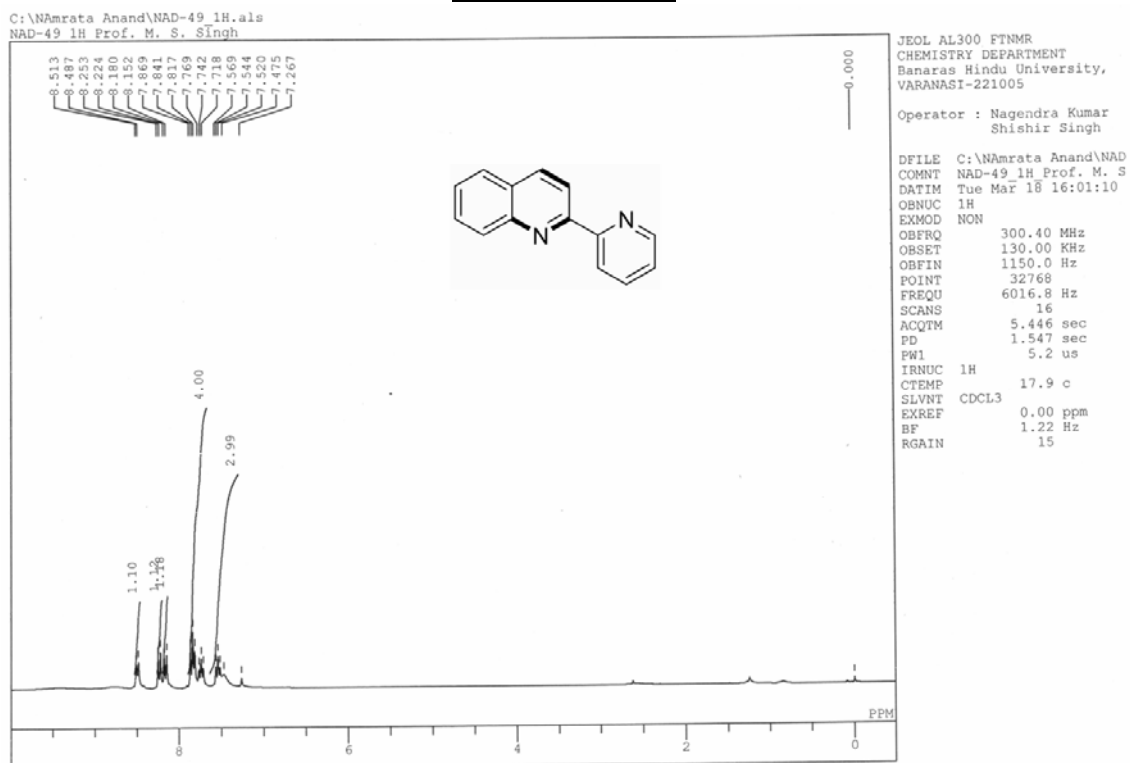

## <sup>13</sup>C NMR of 3ar

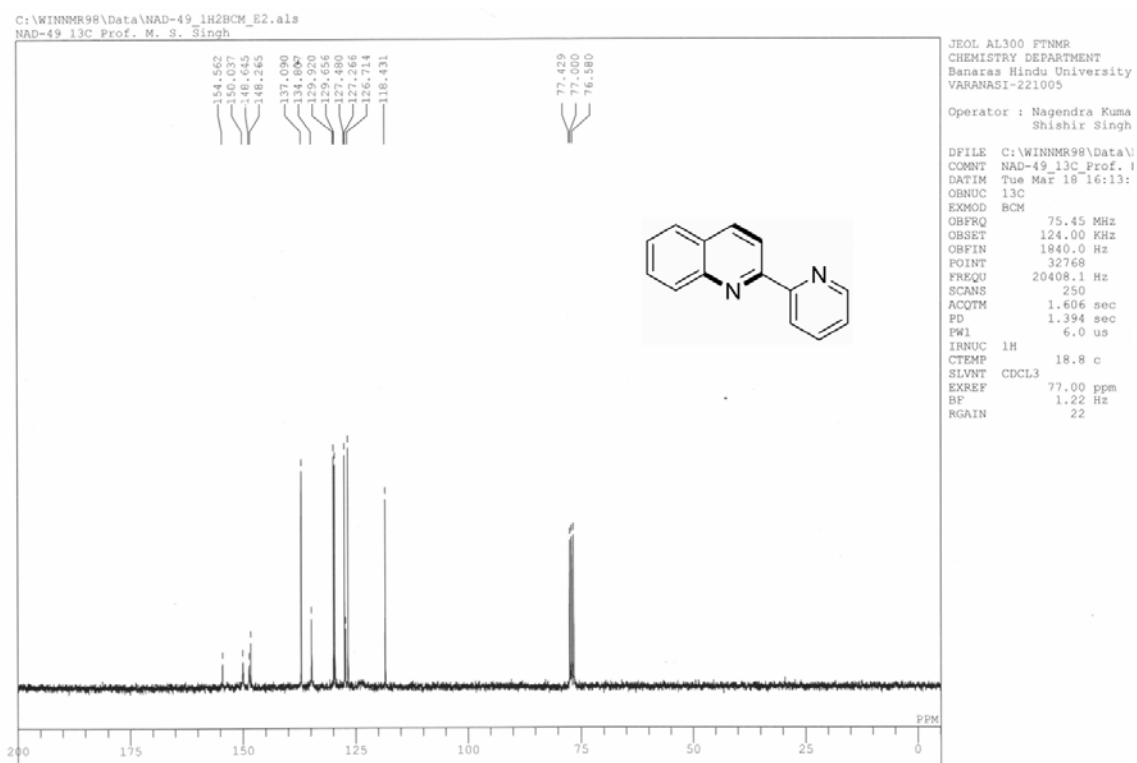

## <sup>1</sup>H NMR of 3ch

C:\Namrata Anand\NAD-81(R)-1H.als  
NAD-81(R)-1H Mrs. Namrata Anand

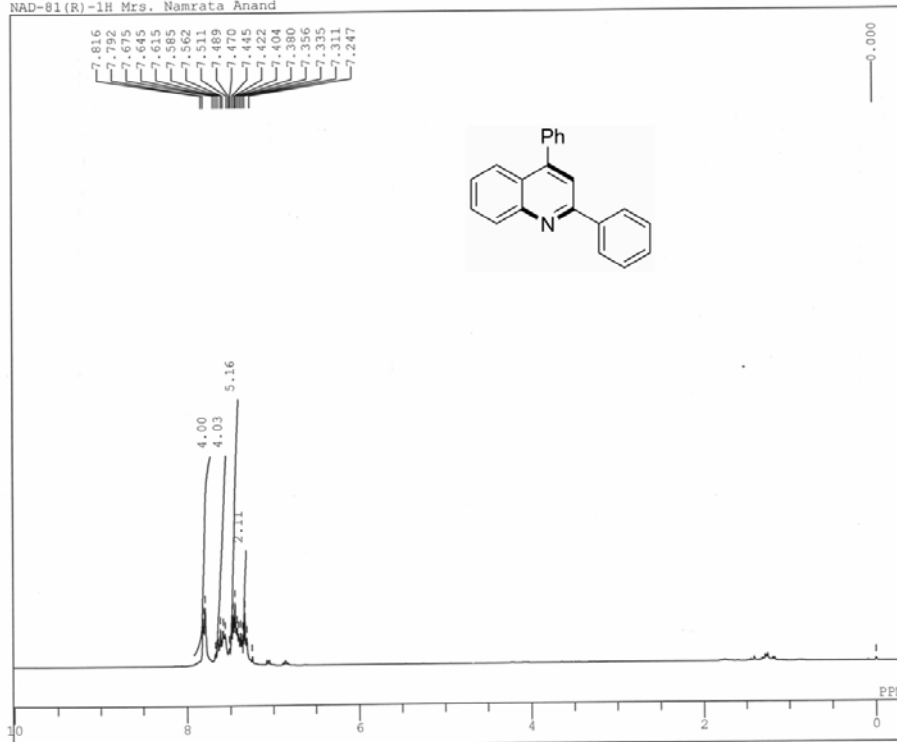

JEOL AL300 FTNMR  
CHEMISTRY DEPARTMENT  
Banaras Hindu University,  
VARANASI-221005

Operator : Nagendra Kumar  
Shishir Singh

DFILE C:\Namrata Anand\NA  
COMNT NAD-81(R)-1H Mrs. N  
DATIM Mon Sep 29 12:58:57  
OBNUC 1H  
EXMOD NON  
OBFRQ 300.40 MHz  
OBSET 130.00 KHz  
OBFIN 1150.0 Hz  
POINT 32768  
FREQU 6016.8 Hz  
SCANS 16  
ACQTM 5.446 sec  
PD 1.547 sec  
PW1 5.0 us  
IRNUC 1H  
CTEMP 19.7 c  
SLVNT CDCL3  
EXREF 0.00 ppm  
BF 1.20 Hz  
RGAIN 12

## <sup>13</sup>C NMR of 3ch

C:\Namrata Anand\NAD-81 13C.als  
NAD-81 1H Ms. Namrata Anand

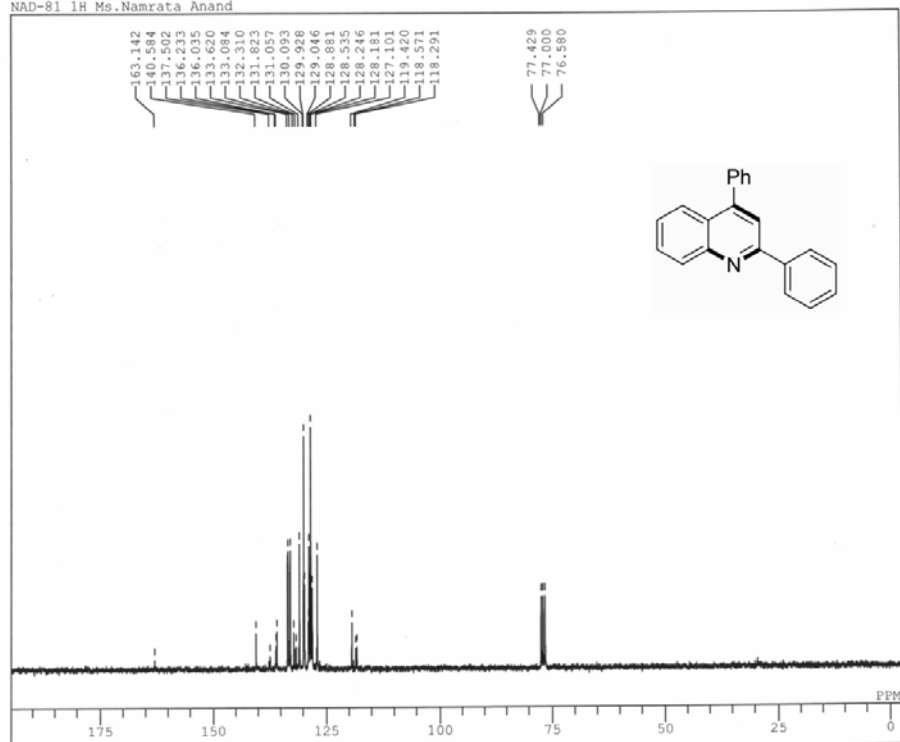

JEOL AL300 FTNMR  
CHEMISTRY DEPARTMENT  
Banaras Hindu University,  
VARANASI-221005

Operator : Nagendra Kumar  
Shishir Singh

DFILE C:\Namrata Anand\NA  
COMNT NAD-81 1H Ms. Namrat  
DATIM Thu May 22 03:19:04  
OBNUC 13C  
EXMOD BCM  
OBFRQ 75.45 MHz  
OBSET 124.00 KHz  
OBFIN 1840.0 Hz  
POINT 32768  
FREQU 20408.1 Hz  
SCANS 200  
ACQTM 1.606 sec  
PD 1.394 sec  
PW1 6.0 us  
IRNUC 1H  
CTEMP 26.2 c  
SLVNT CDCL3  
EXREF 77.00 ppm  
BF 1.20 Hz  
RGAIN 24

## <sup>1</sup>H NMR of 3as

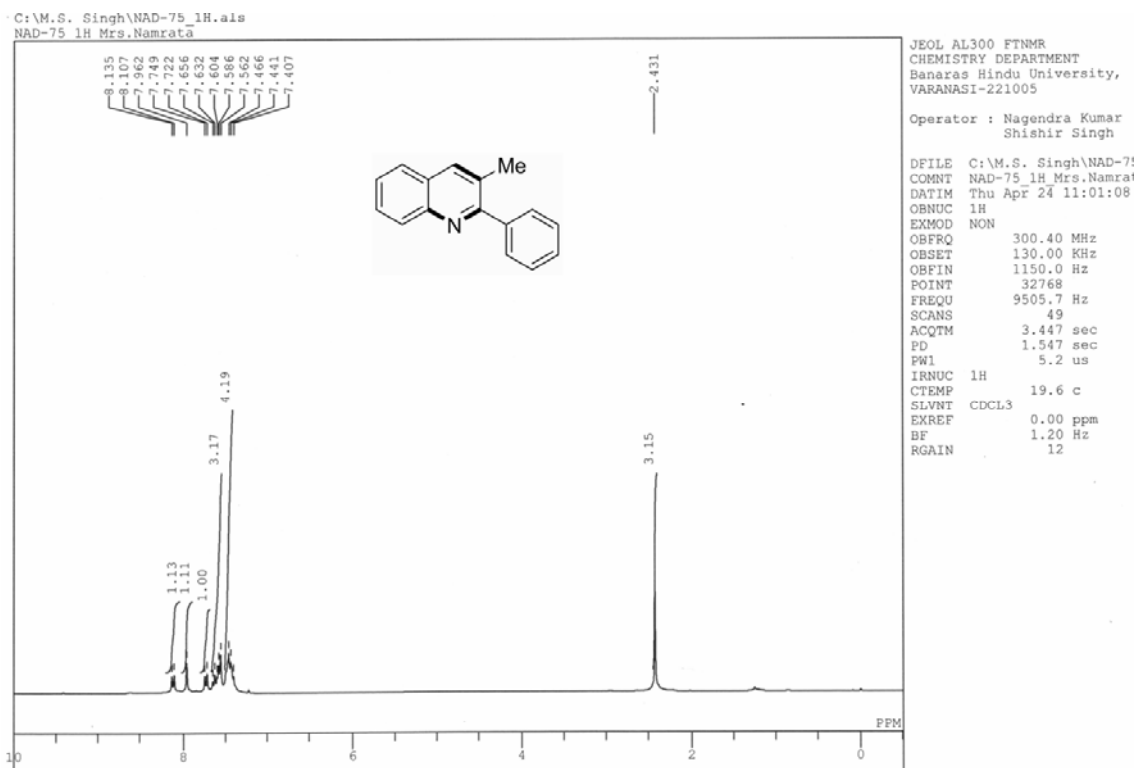

## <sup>13</sup>C NMR of 3as

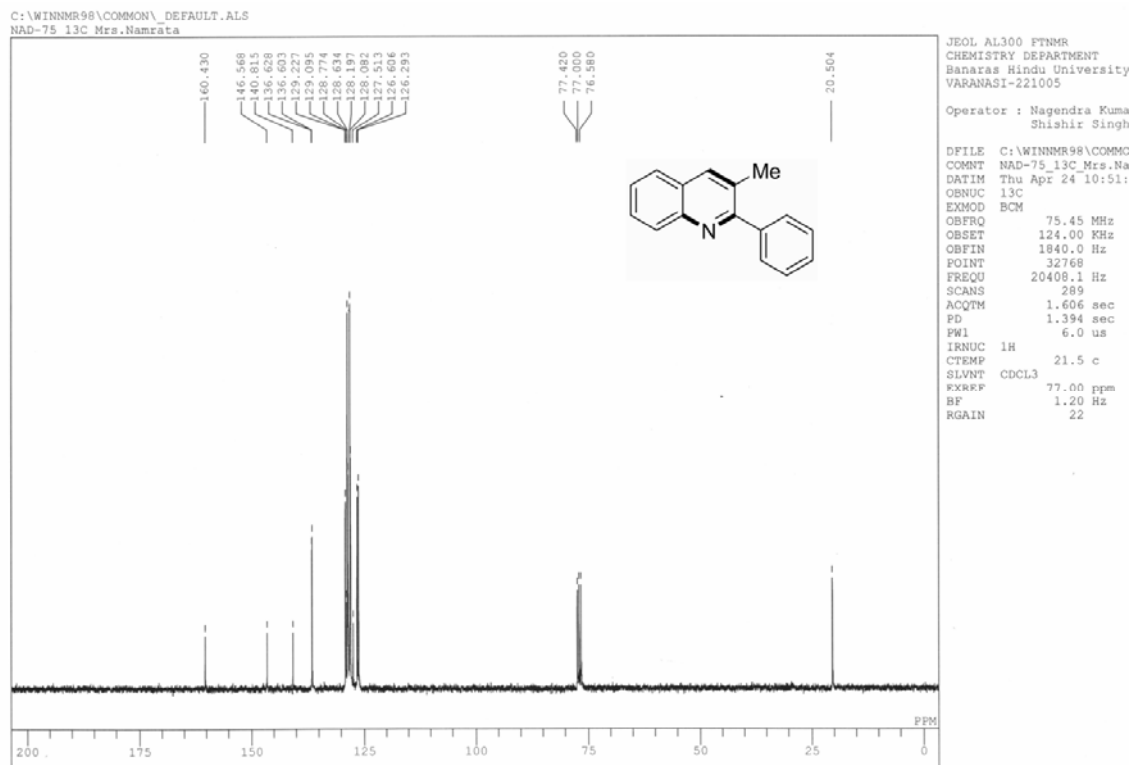

# <sup>1</sup>H NMR of 3at

C:\WINNMR98\Data\NAD-77\_1H1NON\_ES.ALS  
NAD-77 1H Ms.Namrata Anand

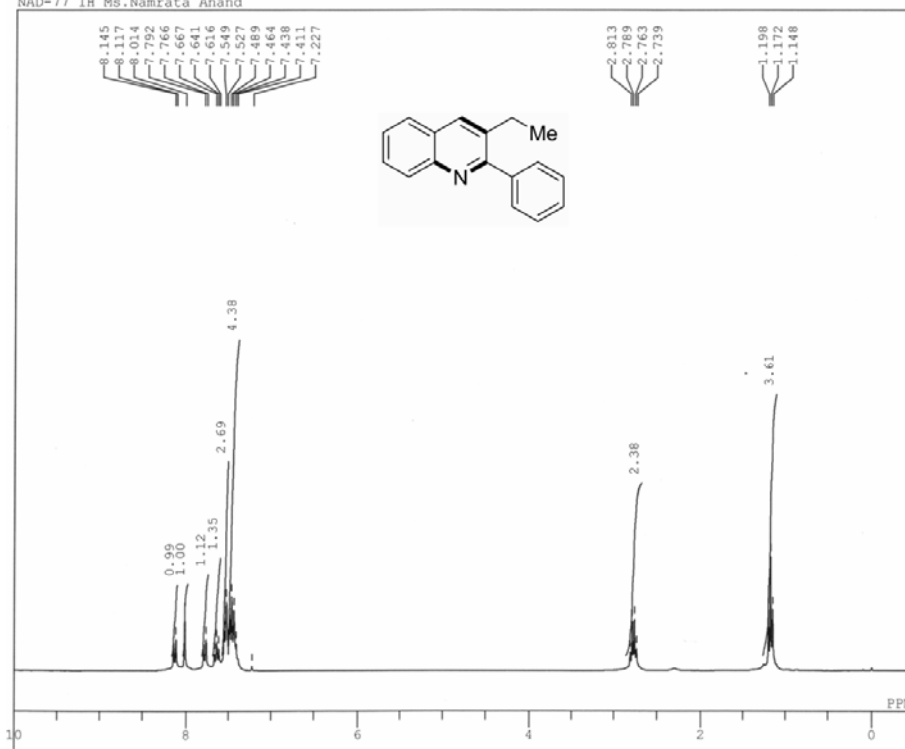

JEOL AL300 FTNMR  
CHEMISTRY DEPARTMENT  
Banaras Hindu University,  
VARANASI-221005

Operator : Nagendra Kumar  
Shishir Singh

DFILE C:\WINNMR98\Data\N  
COMNT NAD-77\_1H Ms.Namra  
DATIM Fri Sep 26 12:12:4  
OBNUC 1H  
EXMOD NON  
OBFRQ 300.40 MHz  
OBSET 130.00 KHz  
OBFIN 1150.0 Hz  
POINT 32768  
FREQU 6016.8 Hz  
SCANS 16  
ACQTM 5.446 sec  
PD 1.547 sec  
PW1 5.0 us  
IRNUC 1H  
CTEMP 22.0 c  
SLVNT CDCL3  
EXREF 0.00 ppm  
BF 1.20 Hz  
RGAIN 13

# <sup>13</sup>C NMR of 3at

C:\WINNMR98\Data\NAD-77\_1H2BCM\_ES.ALS  
NAD-77 13C Ms.Namrata Anand

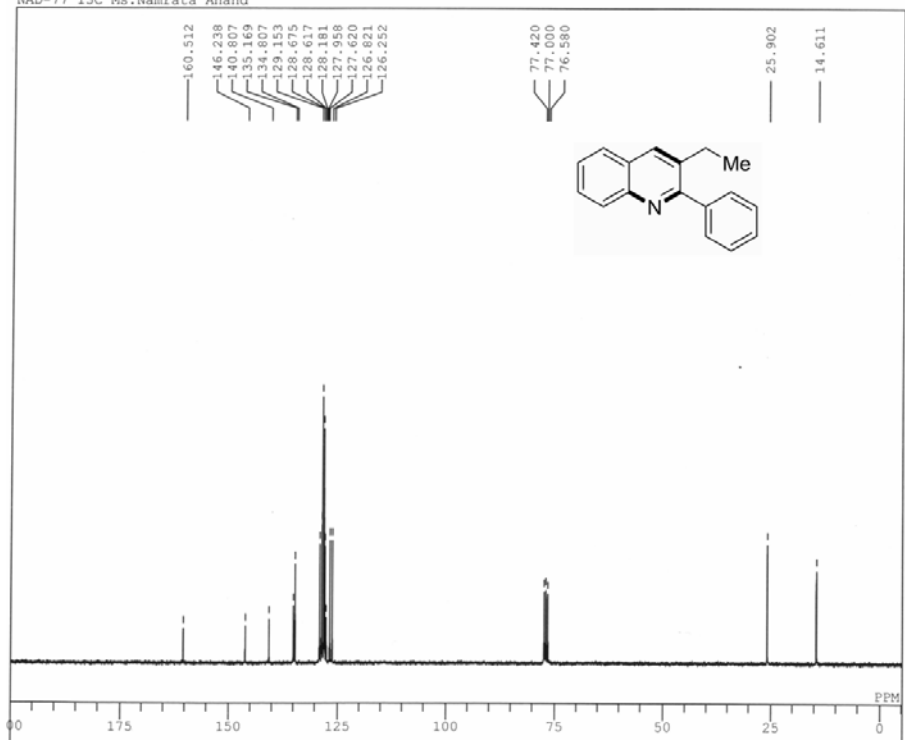

JEOL AL300 FTNMR  
CHEMISTRY DEPARTMENT  
Banaras Hindu University,  
VARANASI-221005

Operator : Nagendra Kumar  
Shishir Singh

DFILE C:\WINNMR98\Data\NAD  
COMNT NAD-77\_13C Ms.Namrat  
DATIM Fri Sep 26 12:28:03  
OBNUC 13C  
EXMOD BCM  
OBFRQ 75.45 MHz  
OBSET 124.00 KHz  
OBFIN 1840.0 Hz  
POINT 32768  
FREQU 20408.1 Hz  
SCANS 300  
ACQTM 1.606 sec  
PD 1.394 sec  
PW1 5.0 us  
IRNUC 1H  
CTEMP 23.3 c  
SLVNT CDCL3  
EXREF 77.00 ppm  
BF 1.20 Hz  
RGAIN 22
